# Supplementary material
Source: PubMed Central journal article supplement (PMC2932885)

# Genetic Interception and Structural Characterization of Thiopeptide Cyclization Precursors from *Bacillus cereus*

Albert A. Bowers, Christopher T. Walsh\*, and Michael G. Acker

Department of Biological Chemistry and Molecular Pharmacology, Harvard Medical School, Boston, Massachusetts 02115

## Supporting Information

### Contents:

1. Materials and General Methods
2. Procedures for Generation of a *tcIM* Knockout and Subsequent Reintroduction
3. Extraction of Intermediates
4. LC-MS and MS/MS Analysis
5. Alignment of TcIM homologs.
6. LC-MS, Extracted Ion Chromatograms, and MS/MS of Mutant Compounds
  - a. MKO
  - b.  $E_{in}$ MKO
  - c. MKI
  - d.  $T3A_{in}$ MKO
7. Table of  $^1\text{H}$  and  $^{13}\text{C}$  NMR assignment for compound **10**.
8. 1D & 2D NMR spectra of **10**.
9. 1D & 2D NMR spectra of **11**.

### 1. Materials and General Methods

All molecular biology, recombinant DNA manipulation and microbiological assays were performed following the protocols of Sambrook *et al.*<sup>1</sup> Unless otherwise specified, all chemicals were purchased from Sigma-Aldrich. Restriction enzymes and Quick Ligase were purchased from New England Biolabs (Boston, MA). Pfu Turbo DNA Polymerase was purchased from Invitrogen (Carlsbad, CA) and Paq 5000 DNA polymerase from Stratagene (La Jolla, CA). DNA oligonucleotide primers were synthesized by Integrated DNA technologies (Coralville, IA). PCR was performed on a Biorad MyCycler thermal cycler. DNA sequencing was performed by the Molecular Biology Core Facilities at the Dana Farber Cancer Institute (Boston, MA). Top10 chemically competent *E. coli* cells were purchased from Invitrogen. Restriction endonuclease cleanup and gel extraction of DNA fragments were performed with QiaQuick PCR cleanup kit from Qiagen. Recombinant plasmids were isolated using the QiaPrep Spin Miniprep Kit from Qiagen. *B. cereus* ATCC 14579 genomic DNA was isolated from cultures using the DNeasy Kit from Qiagen. Analytical RP-HPLC was performed on a Beckman System Gold (Beckman Coulter) instrument using a Phenomenex Luna 5  $\mu\text{m}$  C18(2) 100 Å 250 x 4.6 mm column, monitoring eluent absorption at 220 and 350 nm. Preparative RP-HPLC was performed on a Beckman System Gold (Beckman Coulter) instrument using a Phenomenex Luna 10  $\mu\text{m}$  C18(2) 100 Å 250 x 21.20 mm column.  $^1\text{H}$  NMR spectra were recorded on a Varian 600 MHz spectrometer. Chemical shifts are reported in ppm from tetramethylsilane with the solvent resonance resulting from incomplete deuteration as the internal standard ( $\text{CDCl}_3$   $\delta$  7.26,  $\text{D}_2\text{O}$   $\delta$  4.79,  $\text{CD}_3\text{OD}$   $\delta$  3.31). Data are reported as follows: chemical shift, multiplicity (s = singlet, d = doublet, t = triplet, q = quartet, br = broad, m = multiplet), coupling constants (Hz), and integration. Software and methods used for generation of solution phase structures from NMR data are described in the text.

## 2. Procedures for Generation of a *tcIM* Knockout and Subsequent Reintroduction

In a manner similar to that previously described for plasmid pMGA-*tcI*ΔE-H,<sup>2</sup> pMKO was generated from plasmid pKM082<sup>3</sup>, containing ampicillin and erythromycin resistance cassettes and employed in excision of *tcIM* via double crossover homologous recombination. Two regions of homology were cloned into this plasmid: 1) the 1kb sequence immediately upstream of the *tcIM* start codon and 2) the 1 kb sequence beginning 15bp upstream of the *tcIN* start codon. A rescue plasmid, pMKI, was further generated from pMKO itself, by excision of the 3'-homology region and subsequent ligation with sequence containing *tcIM* and a new 3'-homology region (ABprimer112 and 130).

Removal of *tcIM* from the genome of *B. cereus* ATCC 14579 was accomplished through two individual rounds of homologous recombination. In the first round, the entire plasmid was integrated into the chromosome. Transformation was effected into both wild type *B. cereus* ATCC 14579 and our previously reported *tcIE-H* knockout strain; the transformation protocol, including conditions for growth, inoculation, and electroporation of competent cells from *B. cereus* ATCC14579 has been previously published.<sup>4</sup> Positive transformants were selected for on MLS LB-agar plates (containing 1μg/ml erythromycin and 25μg/mL lincomycin) for 36 hours at 30 °C. Individual colonies were transferred to LB liquid cultures without antibiotic and incubated for 24 hours at 30 °C. The liquid cultures were diluted 1:1000 in antibiotic free LB and again incubated for 24 hours at 30 °C. The second recombination removes the plasmid, the gene of interest, and the erythromycin resistance cassette together with it. Thus, after 7-9 rounds of dilution and growth, the cultures were diluted 10<sup>-5</sup>, plated on LB agar and grown up over 24 hours at 30 °C. Colonies were then replica-plated via sterile velvet onto MLS LB-agar plates. Both the original, antibiotic-free plates and the fresh, MLS-supplemented plates were grown up over 24 hours at 30 °C. Colonies exhibiting growth on the antibiotic-free plates, but not on the MLS plates were re-struck for verification. Subsequent colony PCR in presence of ABprimer109 and 131 was used to confirm the *tcIM* knockout; the knockout strain exhibited a loss of 924 bp in the PCR product, which was further verified by DNA sequencing.

Upon confirmation of the *tcIM* knockout, the above procedure was again employed for reconstitution with pMKI. Introduction of a single copy of *tcIE* and the mutant *tcIE-T3A* into the *E-H,MKO* strain was achieved by our previously reported protocol.<sup>5</sup>

**SI Table 2.1. Oligonucleotides used for cloning and *tcIM* knockout**

| Oligo         | Sequence                                                         | Role            |
|---------------|------------------------------------------------------------------|-----------------|
| ABprimer109   | 5'-GAT CGG ATC CGT TTT TTA ATA AAG GAA TGA TTA TAT G-3'          | MKO-5'-homology |
| ABprimer110   | 5'-GAT CCT CGA GTT AAT CAT CCC TTT CTA CTC TTA TAC-3'            | MKO-5'-homology |
| ABprimer112   | 5'-GAT CCT CGA GGG ATT TTG GTA AAG GGA GGG ATA ATA-3'            | MKO-3'-homology |
| ABprimer131   | 5'-GAT CGC ATG CAA TAT TCA AAA AAT CAG ACA AAA AG-3'             | MKO-3'-homology |
| ABprimer130   | 5'-GAT CCT CGA GAT GGA GCA GTA TCA TAA AAT TG-3'                 | MKI-3'-homology |
| MGAprimer 209 | 5'-GAA ATT ATG GGA GCG TCA TGT GCG ACA TGC GTA TGT ACA TGC AG-3' | T3A mutagenesis |
| MGAprimer 210 | 5'-CTG CAT GTA CAT ACG CAT GTC GCA CAT GAC GCT CCC ATA ATT TC-3' | T3A mutagenesis |

## 3. Extraction of Thiocillin Compounds

Starter cultures (5 mL) were grown in LB for 20 hours at 30 °C. Larger cultures (0.5 L LB in 2 L culture baffles culture flasks) were inoculated with 300 μL of starter culture and grown for 68 hours at 30 °C with shaking at 200 rpm. (*tcIE* mutant strains *E<sub>in</sub>MKO* and *T3A<sub>in</sub>MKO* were grown in media supplemented with 1μg/mL erythromycin and 25μg/mL lincomycin.) Cultures were harvested and both the cell pellet and spent media were saved. To the pellet, 50 mL methanol was added along with 15 g sodium sulfate. The mixture was vortexed vigorously and allowed to sit for at least 10 minutes. The mixture was then filtered through Whatman filter paper (no. 1) and the methanol was removed by vacuum. Solid was solubilized in 10 mL 33%

acetonitrile in water for HPLC analysis. *tcIE* mutants that produced compound at low levels were grown in a 5L fermenter in ECPM1 media lacking glycerol (20 g N-Z amine; 3 g Yeast Extract; 1 g KH<sub>2</sub>PO<sub>4</sub>; 4 g K<sub>2</sub>HPO<sub>4</sub>; 1 g NH<sub>4</sub>Cl; 2.4g K<sub>2</sub>SO<sub>4</sub> in 1 L supplemented with 10 mL 100X Trace Elements (5 g EDTA; 0.5 g FeCl<sub>3</sub>•6H<sub>2</sub>O; 0.05 g ZnO; 0.01 g CuCl<sub>2</sub>•2H<sub>2</sub>O; 0.01 g Co(NO<sub>3</sub>)<sub>2</sub>•6H<sub>2</sub>O; 0.01 g (NH<sub>4</sub>)<sub>6</sub> Mo<sub>7</sub>O<sub>24</sub> in 1 L) and 2 mL of 500X Mg/Ca solution (203 g MgCl<sub>2</sub>; 66.2 g CaCl<sub>2</sub> in 1 L). Cells and media were harvested after 24 hours and extraction was performed as detailed above, scaled accordingly.

Further purification was accomplished by ethyl acetate extraction. Solvents were removed from the crude compound extracts on a rotary evaporator. The crude residue was then dissolved in 40 mL of 1:1 EtOAc: water. The biphasic solution was transferred to a 60mL separatory funnel, shaken and the organic layer removed. The aqueous layer was washed with a further 20 mL of EtOAc and the combined organics were dried over Na<sub>2</sub>SO<sub>4</sub>, filtered through a 60 mL coarse fritted glass funnel, and evaporated to dryness. For purposes of assessing the thiocillin content of the individual layers, the residue from the organic layer was redissolved in 10 mL of acetonitrile. 180 µL of the acetonitrile solution was combined with 180 µL of water and 300 µL of this solution was injected onto the analytical HPLC. 300 µL of the aqueous layer was also injected, being careful to avoid the surface organics retained from the extraction.

#### 4. LC-MS and MS/MS Analysis.

High-resolution LC-MS data was collected in positive ion mode, on an Agilent 6520 Accurate-Mass Q-TOF Mass Spectrometer fitted with an electrospray ionization (ESI) source. The capillary voltage was set to 3500 kV, and the fragmentor voltage at 250 V. The drying gas temperature was maintained at 350°C with a flow rate of 12 L/min and a nebulizer pressure of 45 psi. Separation was effected on a Gemini-NX C18 reverse phase column (5µm, 110A, 2.0 x 50 mm, Phenomenex) for crude mixtures and a Kinetex C18 reverse phase column (2.6µm, 100A, 2.10 x 50 mm, Phenomenex) for chromatographically pure samples. Compounds were eluted in a gradient of solvents A (0.1% formic acid in water) and B (0.1% formic acid in acetonitrile): 2 min. isocratic 2%B, then increasing to 100%B over 10 min., and finally isocratic at 100%B for 2 min. before returning to 2%B and reequilibrating over 4 min. The order of elution relative to tailored states of the final products was conserved across variants, except where the short gradient created elution overlap. At least two analytical runs were performed for extracts from each mutant: crude extract was used in the first run in order to better search for the presence of trace quantities of all tailored states and purified compounds were examined in a second run to obtain high resolution masses with lower ppm error than those observed in the crude runs. Additional structural analysis was accomplished by targeted CID-MS/MS. For all samples examined, the collision energy was varied between 35 and 50 eV, with optimum fragmentation generally being observed at 45 eV. Representative spectra are illustrated below. Essential diagnostic peaks have been labeled.

(1) Sambrook, J.; Fitsch, E. F.; Maniatis, T. *Molecular Cloning. A Laboratory Manual*. 3rd ed; Cold Spring Harbor Laboratory Press: Cold Spring Harbor, NY, 2001.

(2) Acker, M. G.; Bowers, A. A.; Walsh, C. T. *J. Am. Chem. Soc.* **2009**, *131*, 17563.

(3) Brown, L. C.; Acker, M. G.; Clardy, J.; Walsh, C. T.; Fischbach, M. A. *Proc Natl Acad Sci U S A* **2009**, *106*, 2549.

(4) Turgeon, N.; Laflamme, C.; Ho, J.; Duchaine, C. *J. Microbiol. Methods.* **2006**, *67*, 543.

(5) Bowers, A. A.; Acker, M. G.; Koglin, A.; Walsh, C. T. *J. Am. Chem. Soc.* articles ASAP.

## Alignments:

All protein sequences were acquired from GenBank according to published accession numbers or compound-producing species. Protein alignments were performed with ClustalW2 (<http://www.ebi.ac.uk/Tools/clustalw2/index.html>) using the default parameters. Alignment files were analyzed using GeneDoc software version 2.6.002 for PC (<http://www.psc.edu/biomed/genedoc>) with similarity groups enabled.

**Table 1:** Results of protein alignment of TcIM with proposed Diels-Alderase enzymes from other thiazolyl peptide natural product gene clusters.

| Compound         | Producing Organism (Diels-Alderase) | %Identity/Similarity* |
|------------------|-------------------------------------|-----------------------|
| Thiocillin       | Bacillus cereus ATCC 14579 (TcIM)   | N/A                   |
| Nosiheptide      | Streptomyces actuosus (NosO)        | 13/27                 |
| Thiostrepton     | Streptomyces laurentii (TsrE)       | 14/31                 |
| Siomycin         | Streptomyces sioyaensis (SioL)      | 14/31                 |
| GE2270A          | Nonomuraea sp. WU8817 (TpdD)        | 12/32                 |
| Thiomuracin      | Nonomuraea sp. Bp3714-39 (TpdD)     | 11/27                 |
| Cyclothiazamycin | Streptomyces hygroscopicus (CltG)   | 12/29                 |

\*%Identity/Similarity compared to the Thiocillin Diels-Alderase, TcIM

**Alignment 1:** TcIM (Thiocillin) and NosO (Nosiheptide). Identical residues are highlighted in red. Similar residues are highlighted in gray.

```

                *      20      *      40      *      60      *
Thiocillin : -----MEQHKIVLTG-SNAETMLIK-----NLEPVAVKFIN---NYKCFYVFK : 41
Nosiheptide : MTSFGQAPAEAAHAAGAAWLETCIDAPADVVALVAGVVRPLLREPAEPGLPEVPGELRGVGAQPALVVQLE : 75

                80      *      100     *      120     *      140     *
Thiocillin : YSKDFPIIDVYINNKIITENQINKIIONSG--AKYKIYKNSIFN-ETQCNFGMLCDKYIAEFFKKTNEISLNILN : 113
Nosiheptide : VTPGTDLAEPYARARALAAGLGLFVQVAAGRATLVPLAGSVFAGAALCPVTRALLAACPCALLTATEAEQGRP : 150

                160     *      180     *      200     *      220
Thiocillin : QNFESYNKKIEFALEITLISAHYN-----YDSIKKCYLSYASHVNGEFTRWKDPNKIRDIFHKNYLNNKEYLE : 181
Nosiheptide : ALLASAAELSAHTRAVSVSAAPGPRQWEELREGVPLCFLSYRSHAEAFASSRDFKARQAQMDAKYTRAAATLE : 225

                *      240     *      260     *      280     *      300
Thiocillin : SKVSEITDNNNRS-----SISLSDIITEMKKEITTDIEKCNLHVFIPELLQKPGERD--ELEKSOFHKTILNN : 248
Nosiheptide : RLVDGVLTPQCEERGPFVSLPRLRWYEAARRAKPAITELFRACITDLALTEEQPPDTGPPGKGISSSAFHRIIEGS : 300

                *      320     *      340     *      360     *
Thiocillin : PDFSNFMNKDINFLGSRLITVFTYLLRNLTGTONKDRYLLCYLYYKIIIEKYNIDTLEIRDFGGRDNNVEDLQ : 323
Nosiheptide : DGLRDFLDRDPSFLATRLITSLLYTSSVGTALAEYFLCYAVSRACESTFDTDALTVLSGLATSLAS----- : 370

Thiocillin : RY : 325
Nosiheptide : -- : -

```



**Alignment 2:** TsrE (Thiostrepton) and Siol (Siomycin). Identical residues are highlighted in red. Similar residues are highlighted in gray.

```

*      20      *      40      *      60      *
Thiostrepton : ---MSTSEQDLTVSVFWSVQEDLLLDVAAPLLDESVELGETDSWFYLRENHGGRPFLLRLRFASRSRSPVERRLKS : 72
Siomycin      : MSMSSEQDLTVSVFWSVQEDLLLDVAAPTLESVALGETESWFYLRENYGGRPFLLRLRFATRSRSPVERRLKS : 75

*      80      *      100     *      120     *      140     *
Thiostrepton : RIIAHVGPITDADVEITYQPNHEHDWLGCTAGLGLAENFWTETTPALDPLRATRGNRALRLAVAFDFLVCTGV : 147
Siomycin      : RIIAHVGPISASDIPPEHQPNHEHDWLGCEAGLGLAENFWTETTPALRPLRATRGRDALRLAAAFDFLVCSGV : 149

*      160     *      180     *      200     *      220
Thiostrepton : MLAPHLPPSLAKFGYKAGYLSYLATFEGYMLLIRDPEGTRAKHAQRYEKNRPELLRPRLRITLVEQMSSEEDGELITV : 222
Siomycin      : MLAPHLPPPVAKFGFKAGYLSYLATFEGYMLLIRDPEGTRAKHAQRYEQNRNLLRPRLRALVEQMSSEEDGLIADV : 224

*      240     *      260     *      280     *      300
Thiostrepton : PELAREWLVRLRIVYPALQKGFDEGRFYLYATPRKAETAKLTPSPDGLYRRPDEVWLSDLPEPVPVAGIHRAIADN : 297
Siomycin      : PELAREWAVRLRCYLPAIRKGFDEGRFYLYATPRKAETAKLTPSPDGLYRRKVEWLSADLPEAPVAGIHRAIADN : 299

*      320     *      340     *      360     *
Thiostrepton : TTYQGMIREDRRFLASRLAQAYTNWHLYRLGFLLDADRYTLFYLIARAFEEYDLDAAALIRSVPEAEVAG : 368
Siomycin      : TTYQGMIREDRRFLASRLAQAYTNWHLYRLGFLLDADRYTLFYLIARAFEEYDLDAAALIRSVPEAEVAG : 370

```

**Alignment 3:** TpdD (GE2270A), TpdD (Thiomuracin) and CltG (Cyclothiazamycin). Identical residues are highlighted in red. Similar residues (similarity limit = 50%) are highlighted in gray.

```

*      20      *      40      *      60      *
GE2270A      : MSWRRVDVAVHDPDLDGLIILATRPLLAGTPGRGWEQRHWVVRGPHLELWFDA----AQPWERTRDVLPEWL : 67
Thiomuracin   : MTWTRIRVDVHDPMDLIIIDALRP--AWHEIRGYFTRHWVCGPHLRIFVDG----DAT---PIVRAVERHL : 63
Cyclothiazamycin : -----MAPWAEAAWFCRHWLRGPHLRINRCRGTDWEVRVPTVTCGLVTDYL : 47

*      80      *      100     *      120     *      140
GE2270A      : RVNPSRARIDRDRLAQHRHLAAERIDEPLLPFYADNTLHRAAPRSRAHVI GGPAEETFHDBHTASAVAY : 140
Thiomuracin   : AQCPSAGTTDPOALLPLHERLAELECGRGPILLPWARDNTVTAEPFG----LDTEIDRFADBEYADTTEAAF : 130
Cyclothiazamycin : RARPSAARLECALAPVHARLAELEMETGERHPWVDNTVLERDYDRLPVLESRLSELLAGLSLSDTNGCAF : 120

*      160     *      180     *      200     *      22
GE2270A      : DELDAVRACESRIVMADLDMVAHAHAHAE----GG--VRCGFVSRSHAAFTAS--APC--LREWRDAEVAAR : 204
Thiomuracin   : DALGRVRACTPIPGIAFDLVVA TAHDLSE----GG--LPTARTSLRSHAEAYLSR--LPCGVRAKWAHVERN : 195
Cyclothiazamycin : RAYERVRCGALSLLALDLWTTSTVAVPFTTGCEPDERGFSLRSHADAFLSRTRDPVAVRAAFDRDRRQ : 193

*      240     *      260     *      280     *
GE2270A      : AGAIRARITAVVAGIPRCR-----AWAGLLDRFADRGDGLIASCALLVEFAG : 251
Thiomuracin   : CEELTARIKALTCAGEPG-----AWLRTIRATRDRGRITLIDECRLSLCYAT : 241
Cyclothiazamycin : ETVLCERLRSVEAALSDGATEGDGADRSDRSRSEAVGDVVPFVTEWAAAVRHHQRTAHPILLASCEVSMCGAA : 266

*      300     *      320     *      340     *      360
GE2270A      : PDAVARP---DLAFHRALEGRTWHEEELRSAPFRRYRLLNLTITQLSRLGVNAVORALLCHFAASAVEQE : 320
Thiomuracin   : DGFSTRPPLAAVSPFHRNLETDERW-LALNDTPAFAYRLALNCAYLHLTRIGLTDQRFLICHIAASAADDV : 313
Cyclothiazamycin : RARMPTR--RTSEFEAVLRSDHGHEDFVRTDDWFAFRLLMNNLYLHLNRLGLKPVDRALLCHLAAITVEAV : 337

*      380     *      400
GE2270A      : YGVSAEVIAMGG----- : 333
Thiomuracin   : YRIVAS----- : 319
Cyclothiazamycin : HGVDAVGSFQRYVASVDPSSERPEWRRRIGEAWAAGGAG : 375

```

**Alignment 4a:** Predicted Diels-Alderase enzymes in thiazolyl peptide antibiotic biosynthesis gene clusters, depicting amino acid identity. 100% identity = red; 75% identity = blue; 50% identity = gray.

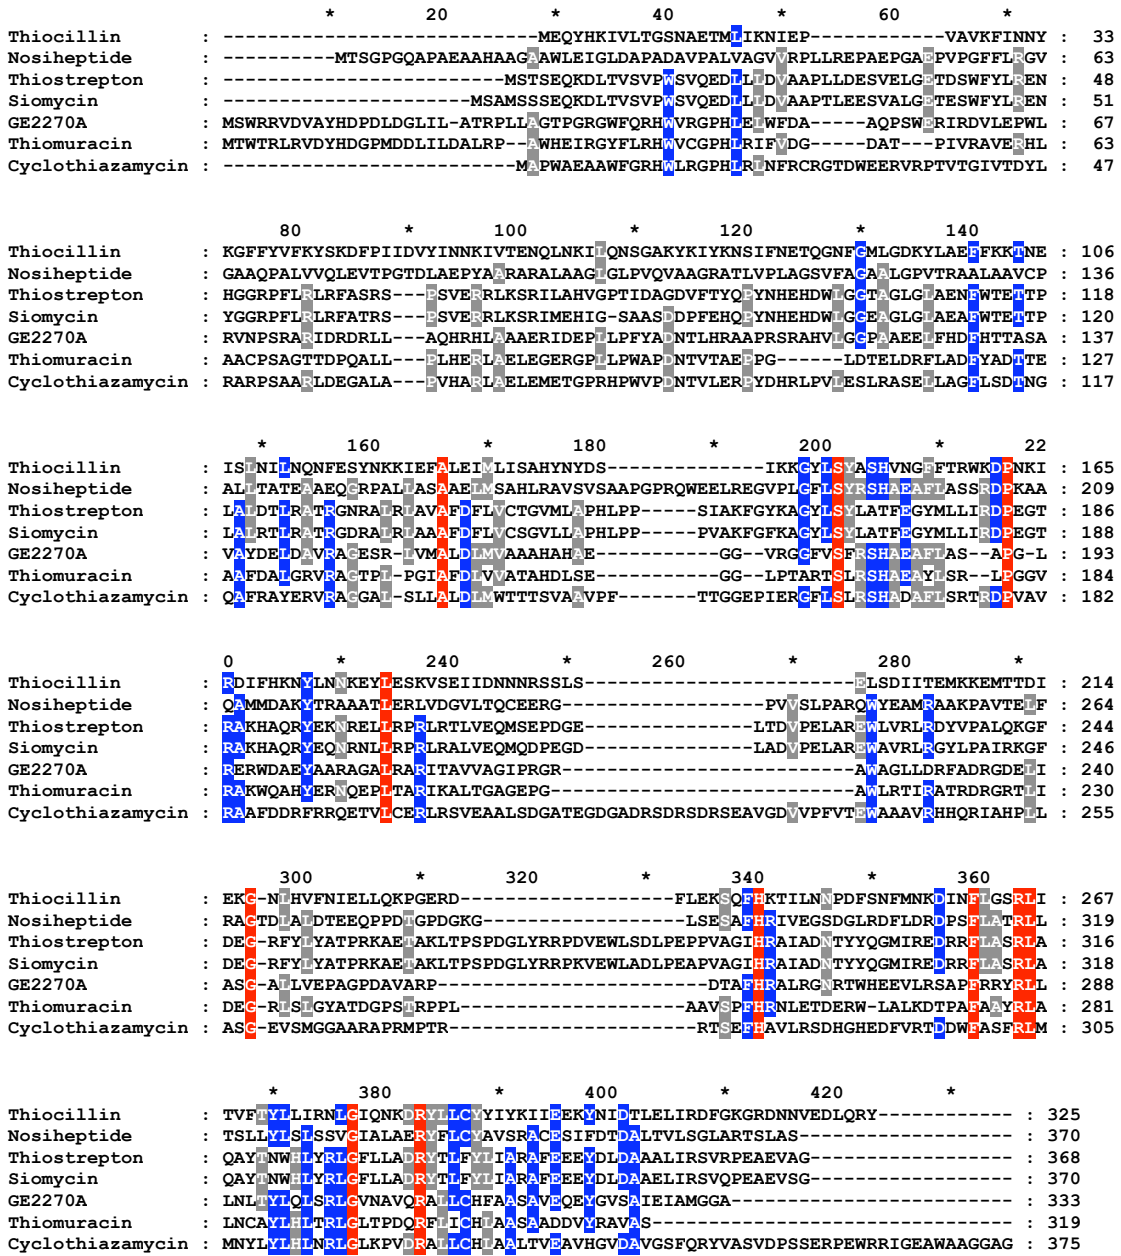

**Alignment 4b:** Predicted Diels-Alderase enzymes in thiazolyl peptide antibiotic biosynthesis gene clusters, depicting amino acid similarity. 100% similarity = red; 75% similarity = blue; 50% similarity = gray.

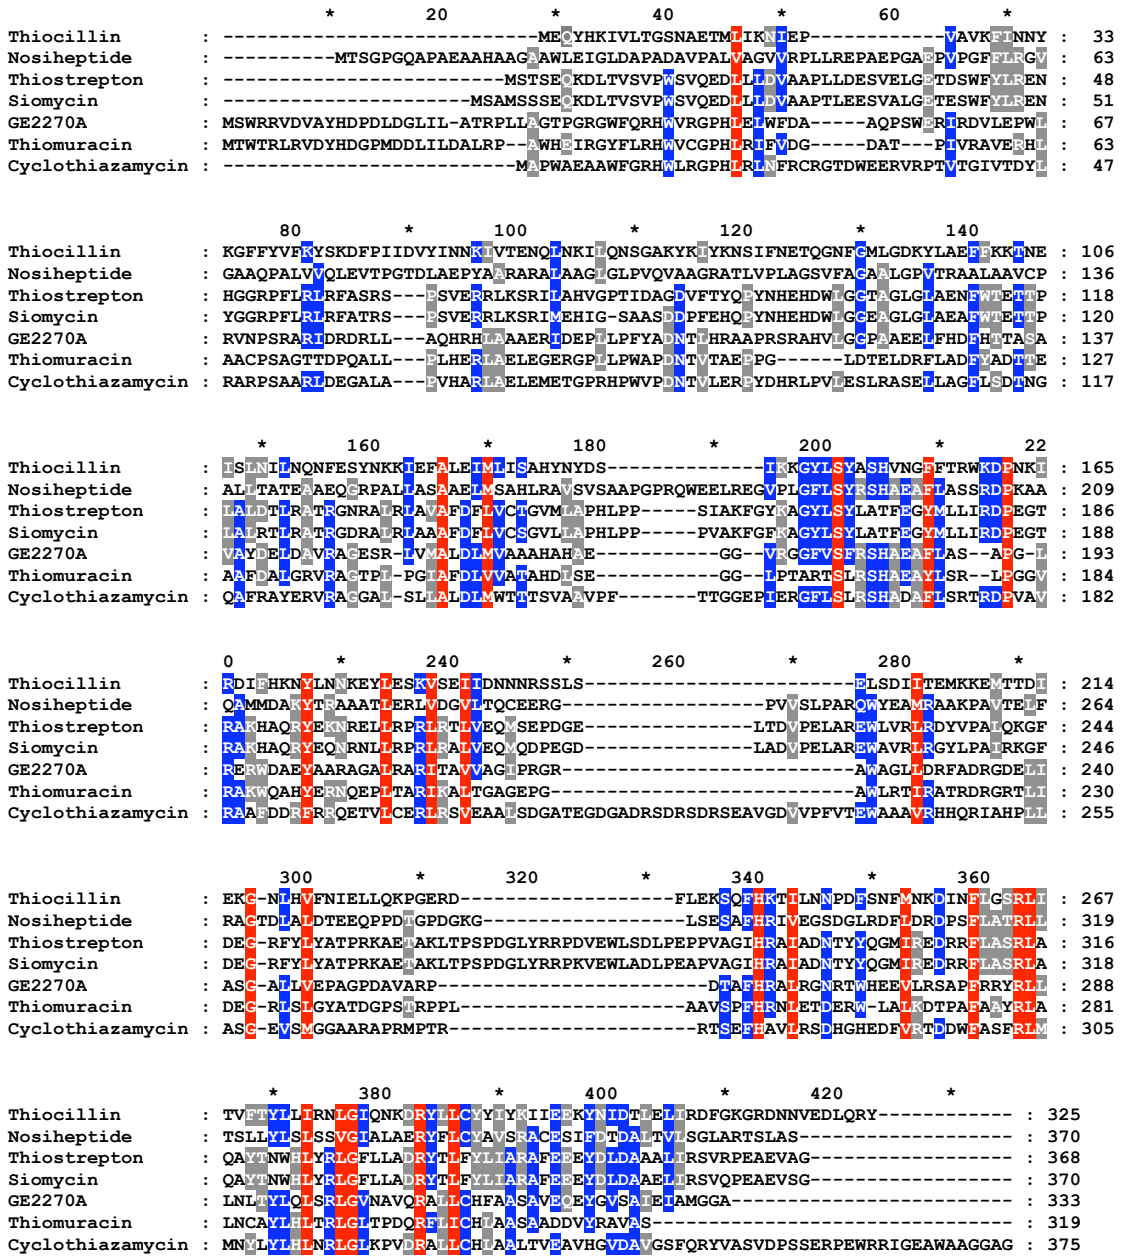

# LC/MS Figure 1: Extracts from MKO cultures.

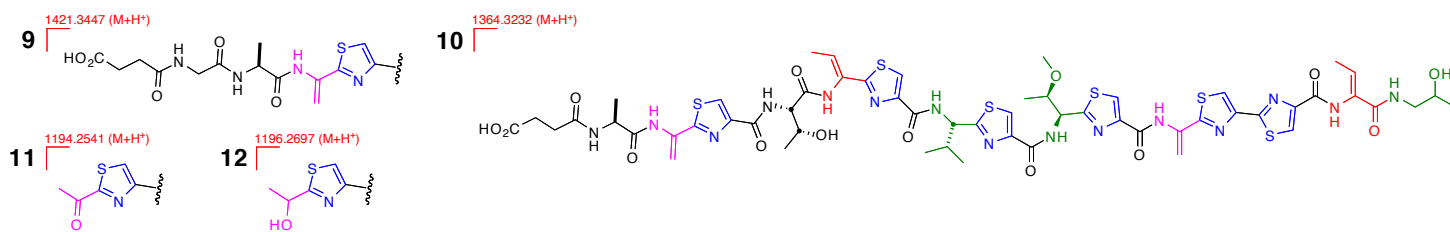

| Compound                             | RT   | Expected (M+H) <sup>+</sup> | Observed (M+H) <sup>+</sup> | Error (ppm) | Expected (M+Na) <sup>+</sup> | Observed (M+Na) <sup>+</sup> | Error (ppm) |
|--------------------------------------|------|-----------------------------|-----------------------------|-------------|------------------------------|------------------------------|-------------|
| <b>9</b> ( <i>N</i> -succ-Gly-Ala)   | 9.03 | 1421.3447                   | 1421.3444                   | 0.21        | 1443.3266                    | 1443.3365                    | -6.86       |
| <b>10</b> ( <i>N</i> -succ-Ala)      | 9.29 | 1364.3232                   | 1364.3254                   | 1.61        | 1386.3054                    | 1386.3154                    | -7.21       |
| <b>11</b> ( <i>N</i> -term ketone)   | 9.64 | 1194.2541                   | 1194.2534                   | -0.59       | 1216.236                     | 1216.2433                    | -6.00       |
| <b>12</b> ( <i>N</i> -term hydroxyl) | 9.38 | 1196.2697                   | 1196.27                     | 0.25        | 1218.2516                    | 1218.2445                    | 5.83        |

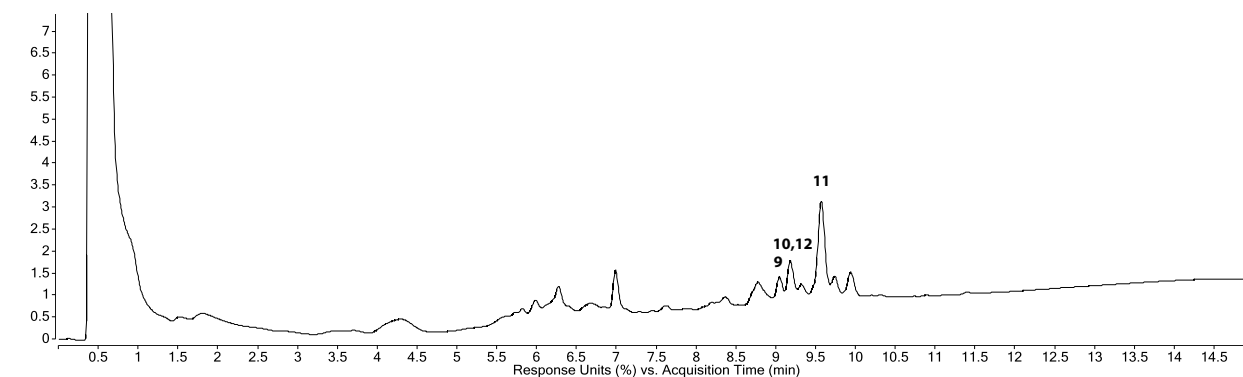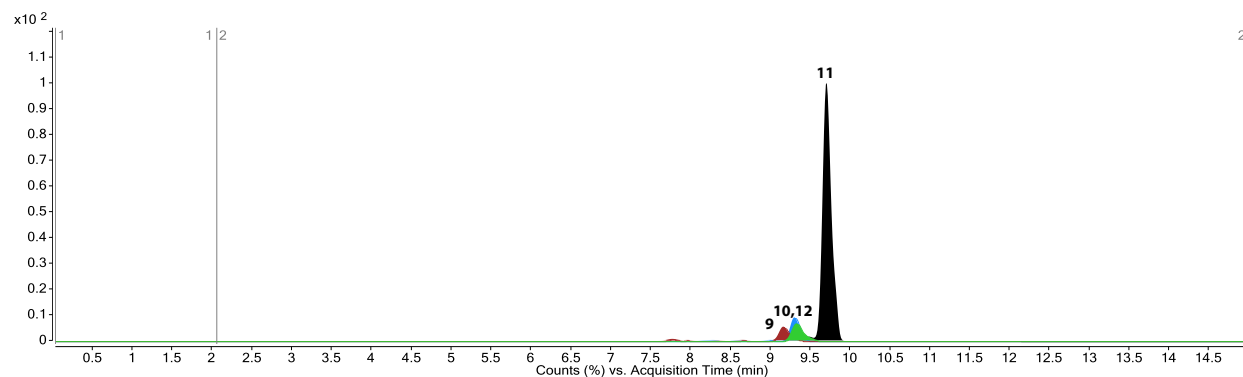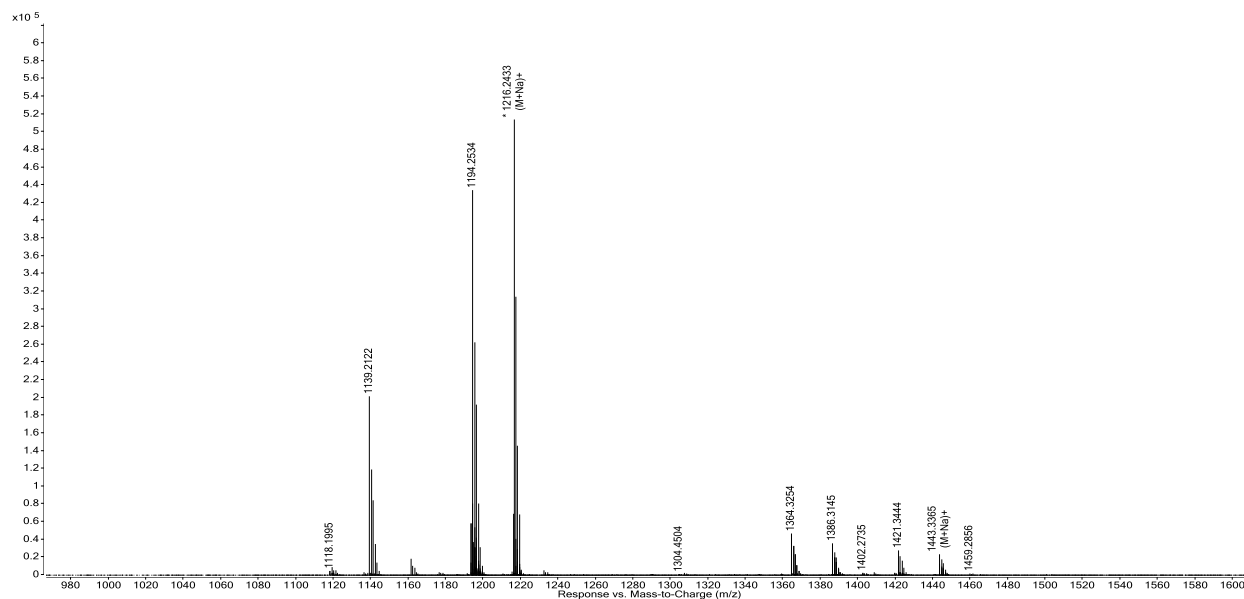

## LC/MS Figure 2: Extracts from *EinMKO* cultures.

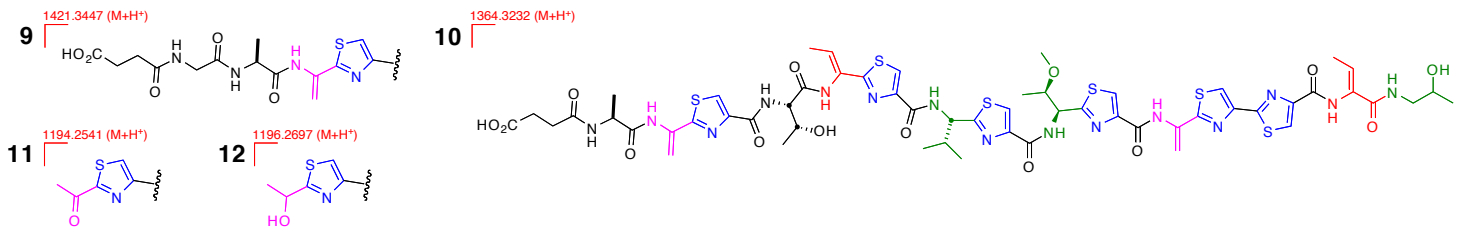

| Compound                             | RT   | Expected (M+H) <sup>+</sup> | Observed (M+H) <sup>+</sup> | Error (ppm) | Expected (M+Na) <sup>+</sup> | Observed (M+Na) <sup>+</sup> | Error (ppm) |
|--------------------------------------|------|-----------------------------|-----------------------------|-------------|------------------------------|------------------------------|-------------|
| <b>9</b> ( <i>N</i> -succ-Gly-Ala)   | 9.03 | 1421.3447                   | 1421.3458                   | -0.77       | 1443.3266                    | 1443.3299                    | -2.29       |
| <b>10</b> ( <i>N</i> -succ-Ala)      | 9.29 | 1364.3232                   | 1364.322                    | -0.88       | 1386.3054                    | 1386.3097                    | -3.10       |
| <b>11</b> ( <i>N</i> -term ketone)   | 9.64 | 1194.2541                   | 1194.2551                   | 0.84        | 1216.236                     | 1216.238                     | -1.64       |
| <b>12</b> ( <i>N</i> -term hydroxyl) | 9.38 | 1196.2697                   | 1196.2694                   | -0.25       | 1218.2516                    | 1218.2545                    | -2.38       |

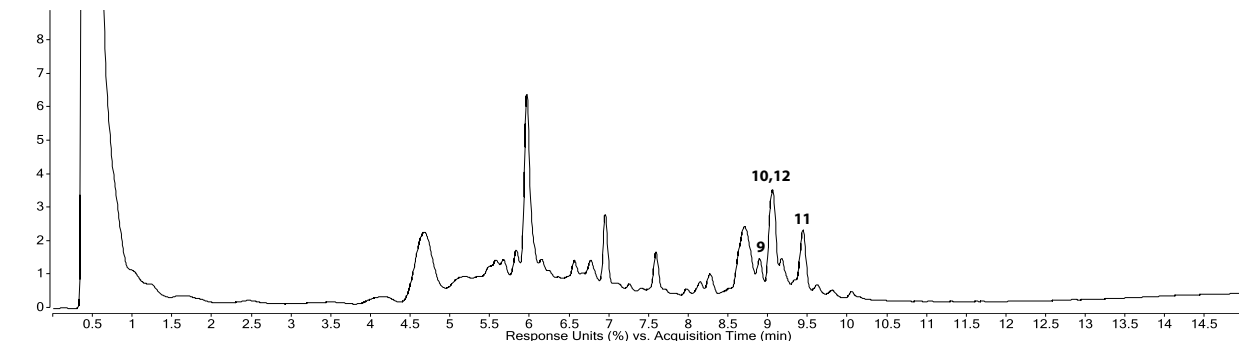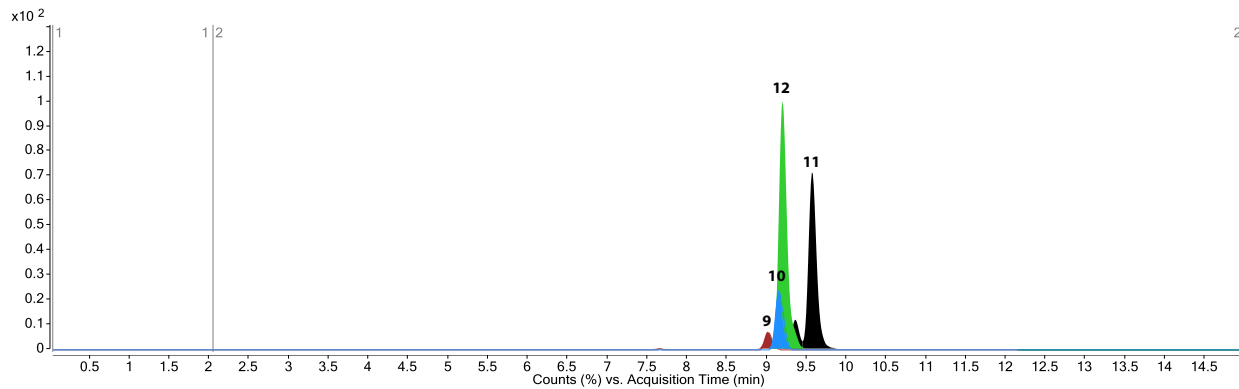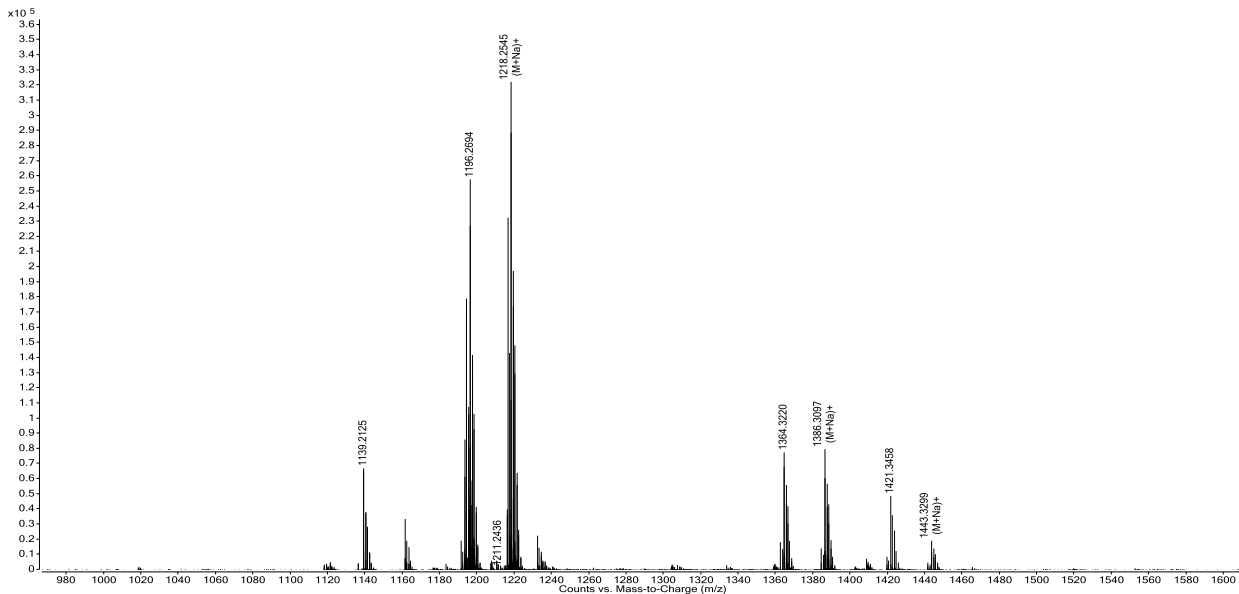

# LC/MS Figure 3: Extracts from *MKI* cultures.

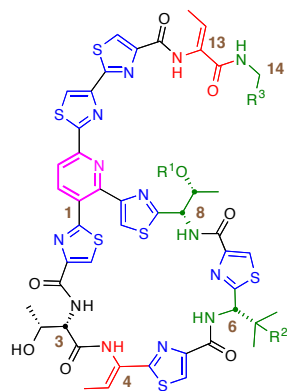

|                    | $R_1$ |                 | $R_2$ |    | $R_3$ |
|--------------------|-------|-----------------|-------|----|-------|
|                    | H     | CH <sub>3</sub> | H     | OH |       |
| thiocillin I (1)   |       |                 |       |    |       |
| thiocillin II (2)  |       |                 |       |    |       |
| thiocillin III (3) |       |                 |       |    |       |
| thiocillin IV (4)  |       |                 |       |    |       |
| micrococin P1 (5)  |       |                 |       |    |       |
| micrococin P2 (6)  |       |                 |       |    |       |
| YM-266183 (7)      |       |                 |       |    |       |
| YM-266184 (8)      |       |                 |       |    |       |

| Compound                  | RT   | Expected (M+H) <sup>+</sup> | Observed (M+H) <sup>+</sup> | Error (ppm) | Expected (M+Na) <sup>+</sup> | Observed (M+Na) <sup>+</sup> | Error (ppm) |
|---------------------------|------|-----------------------------|-----------------------------|-------------|------------------------------|------------------------------|-------------|
| <b>2</b> (thiocillin II)  | 8.15 | 1174.2278                   | 1174.244                    | -13.80      | 1196.2098                    | 1196.2206                    | -9.03       |
| <b>3</b> (thiocillin III) | 7.95 | 1158.2329                   | 1158.2229                   | -8.63       | 1180.2149                    | 1180.2056                    | 7.88        |
| <b>8</b> (YM-266184)      | 8.10 | 1172.2122                   | 1172.21                     | -1.88       | 1194.1941                    | 1194.2001                    | -5.02       |

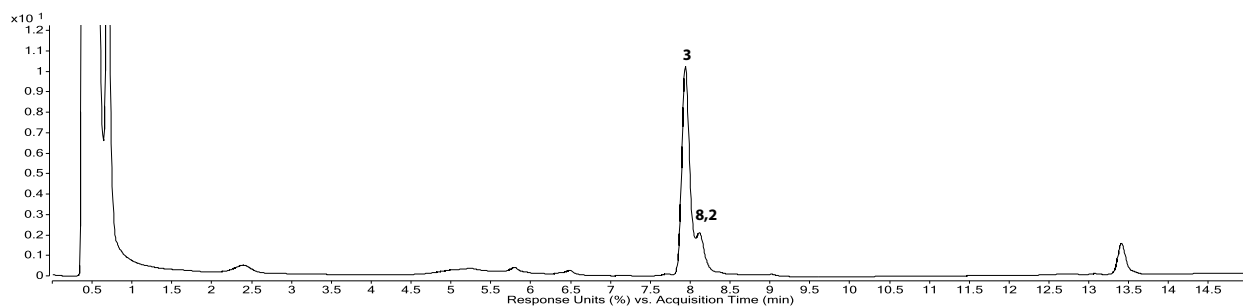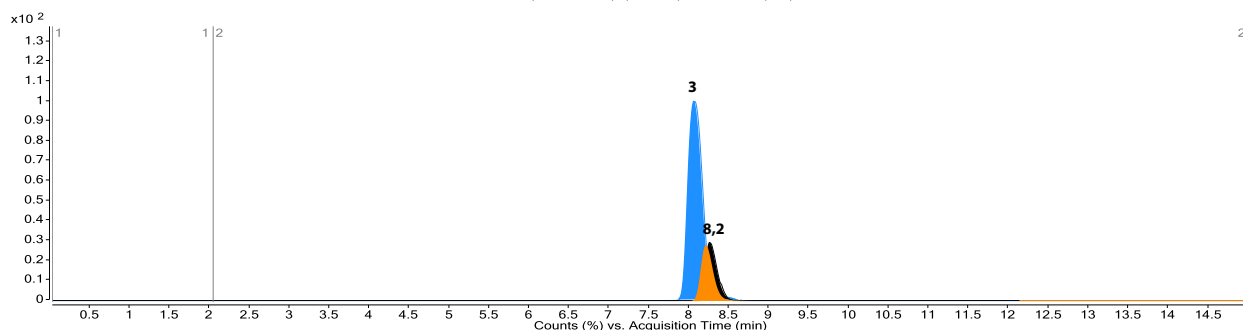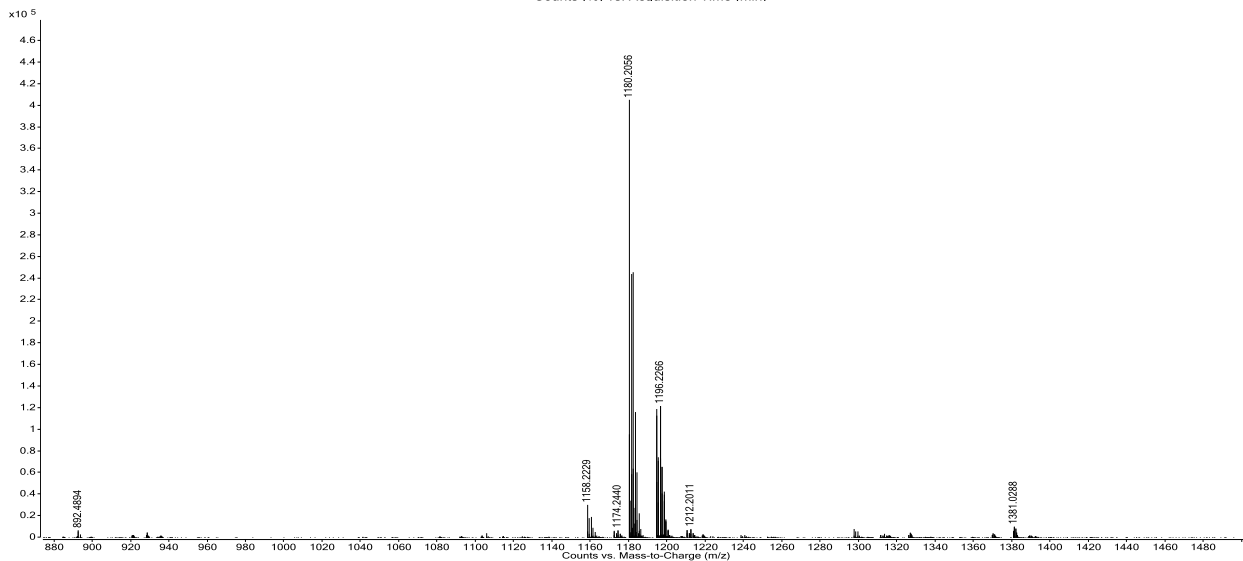

# LC/MS Figure 4: Extracts from *T3AinMKO* cultures.

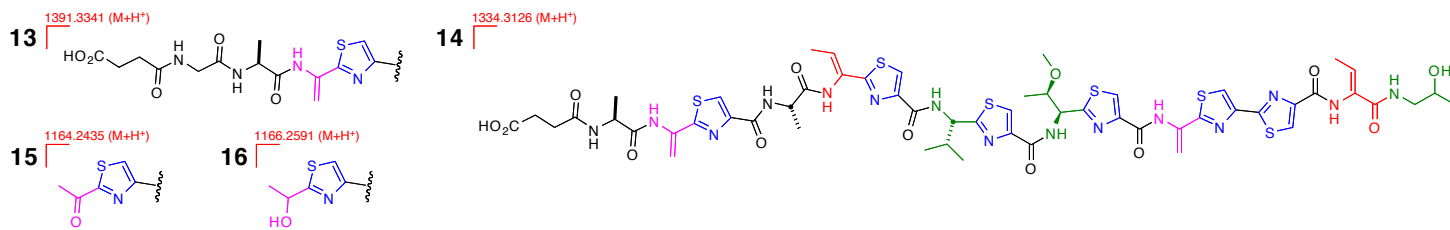

| Compound                             | RT   | Expected (M+H) <sup>+</sup> | Observed (M+H) <sup>+</sup> | Error (ppm) | Expected (M+Na) <sup>+</sup> | Observed (M+Na) <sup>+</sup> | Error (ppm) |
|--------------------------------------|------|-----------------------------|-----------------------------|-------------|------------------------------|------------------------------|-------------|
| <b>13</b> ( <i>N</i> -succ-Gly-Ala)  | 9.26 | 1391.3341                   | 1391.3322                   | 1.37        | 1413.316                     | 1413.32                      | -2.83       |
| <b>14</b> ( <i>N</i> -succ-Ala)      | 9.44 | 1334.3126                   | 1334.3091                   | -2.62       | 1356.2946                    | 1356.2913                    | 2.43        |
| <b>15</b> ( <i>N</i> -term ketone)   | 9.95 | 1164.2435                   | 1164.244                    | 0.43        | 1186.2254                    | 1186.2274                    | -1.69       |
| <b>16</b> ( <i>N</i> -term hydroxyl) | 9.48 | 1166.2591                   | 1166.2568                   | -1.97       | 1188.2411                    | 1188.2388                    | 1.94        |

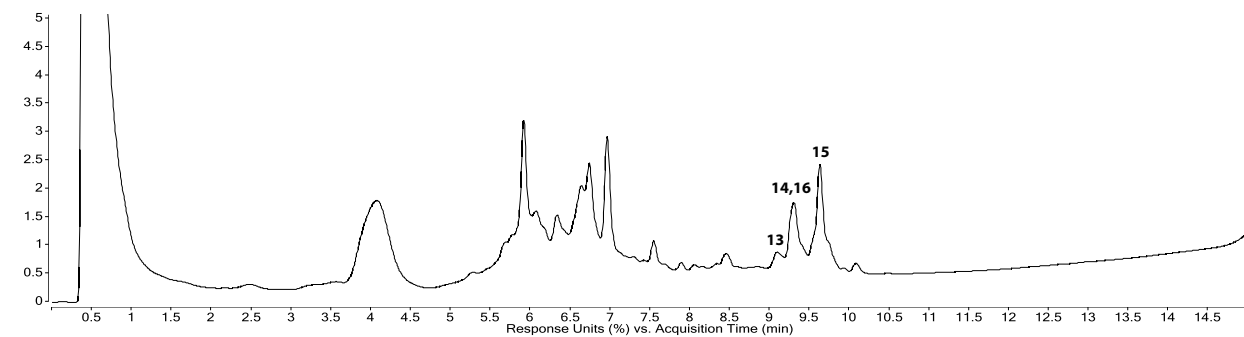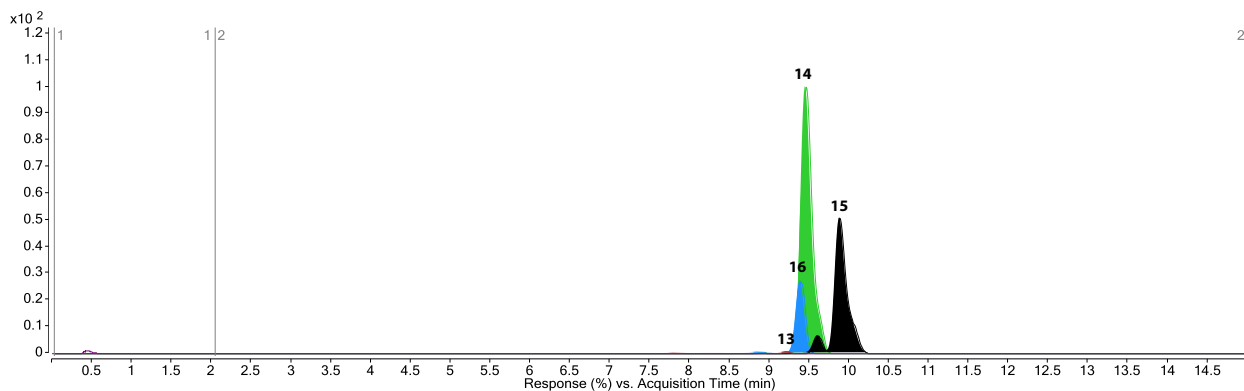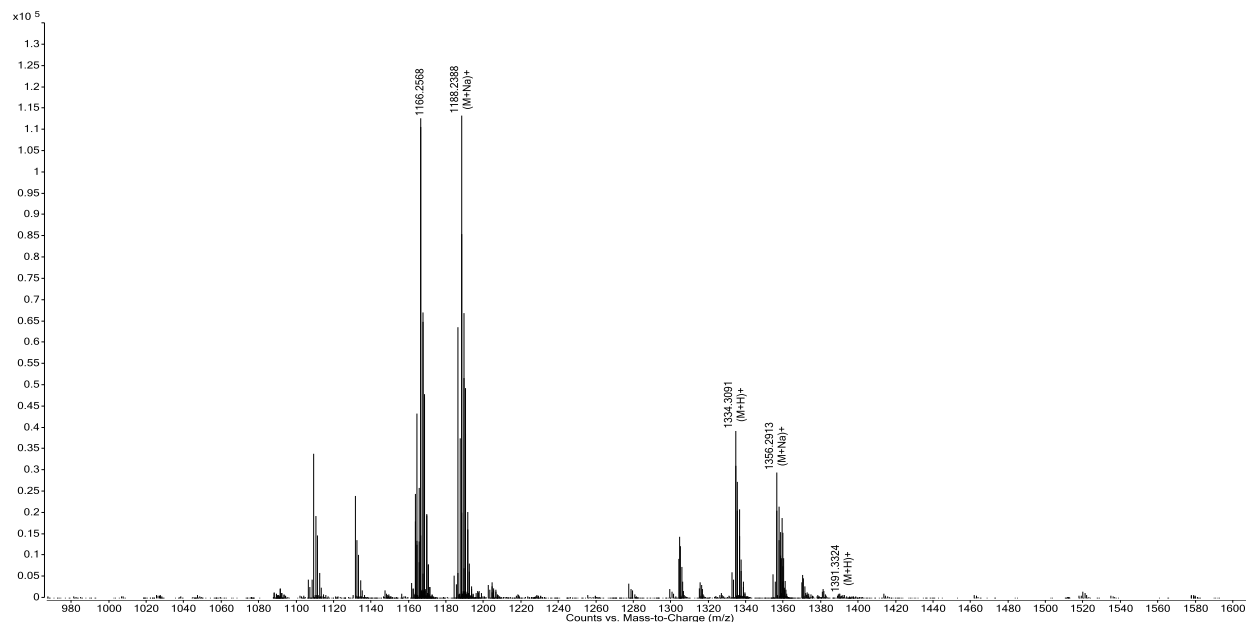

MS/MS Figure 1: Compound **10** (1364.3232).

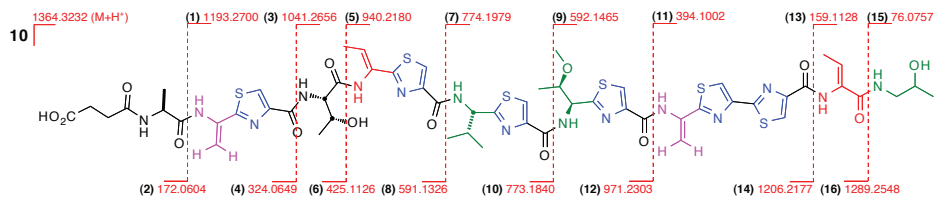

| Fragment                                         | Observed (M+H) <sup>+</sup> | Expected (M+H) <sup>+</sup> | Error (ppm) |
|--------------------------------------------------|-----------------------------|-----------------------------|-------------|
| Parent-H <sub>2</sub> O                          | 1346.3285                   | 1346.31268                  | -11.75      |
| <b>1</b>                                         | 1193.2908                   | 1193.27008                  | -17.36      |
| <b>1</b> -H <sub>2</sub> O                       | 1175.2807                   | 1175.25952                  | -18.02      |
| <b>16</b> -2                                     | 1118.2197                   | 1118.20167                  | -16.12      |
| <b>16</b> -2-CH <sub>3</sub> OH                  | 1086.194                    | 1086.17546                  | -17.07      |
| <b>14</b> -2                                     | 1052.209                    | 1052.19111                  | -17.00      |
| <b>5</b>                                         | 940.231                     | 940.21797                   | -13.86      |
| <b>5</b> -H <sub>2</sub> O                       | 922.2233                    | 922.20741                   | -17.23      |
| <b>14</b> -4                                     | 883.1745                    | 883.16012                   | -16.28      |
| <b>14</b> -4-H <sub>2</sub> O                    | 865.1616                    | 865.14956                   | -13.92      |
| <b>14</b> -4-H <sub>2</sub> O-CH <sub>3</sub> OH | 833.1368                    | 833.12334                   | -16.16      |
| <b>14</b> -6+NH <sub>2</sub>                     | 799.1502                    | 799.13899                   | -14.03      |
| <b>14</b> -6+NH <sub>2</sub> -CH <sub>3</sub> OH | 767.1225                    | 767.11278                   | -12.67      |
| <b>12</b> -6                                     | 547.1353                    | 547.12504                   | -18.75      |
| <b>12</b> -6-CH <sub>3</sub> OH                  | 515.1054                    | 515.09883                   | -12.75      |
| <b>11</b> -H <sub>2</sub> O                      | 376.0943                    | 376.08964                   | -12.39      |
| <b>16</b> -12                                    | 319.0338                    | 319.03179                   | -6.30       |
| <b>6</b> -2                                      | 254.0625                    | 254.05939                   | -12.24      |
| <b>6</b> -2-CO                                   | 226.0664                    | 226.06447                   | -8.54       |

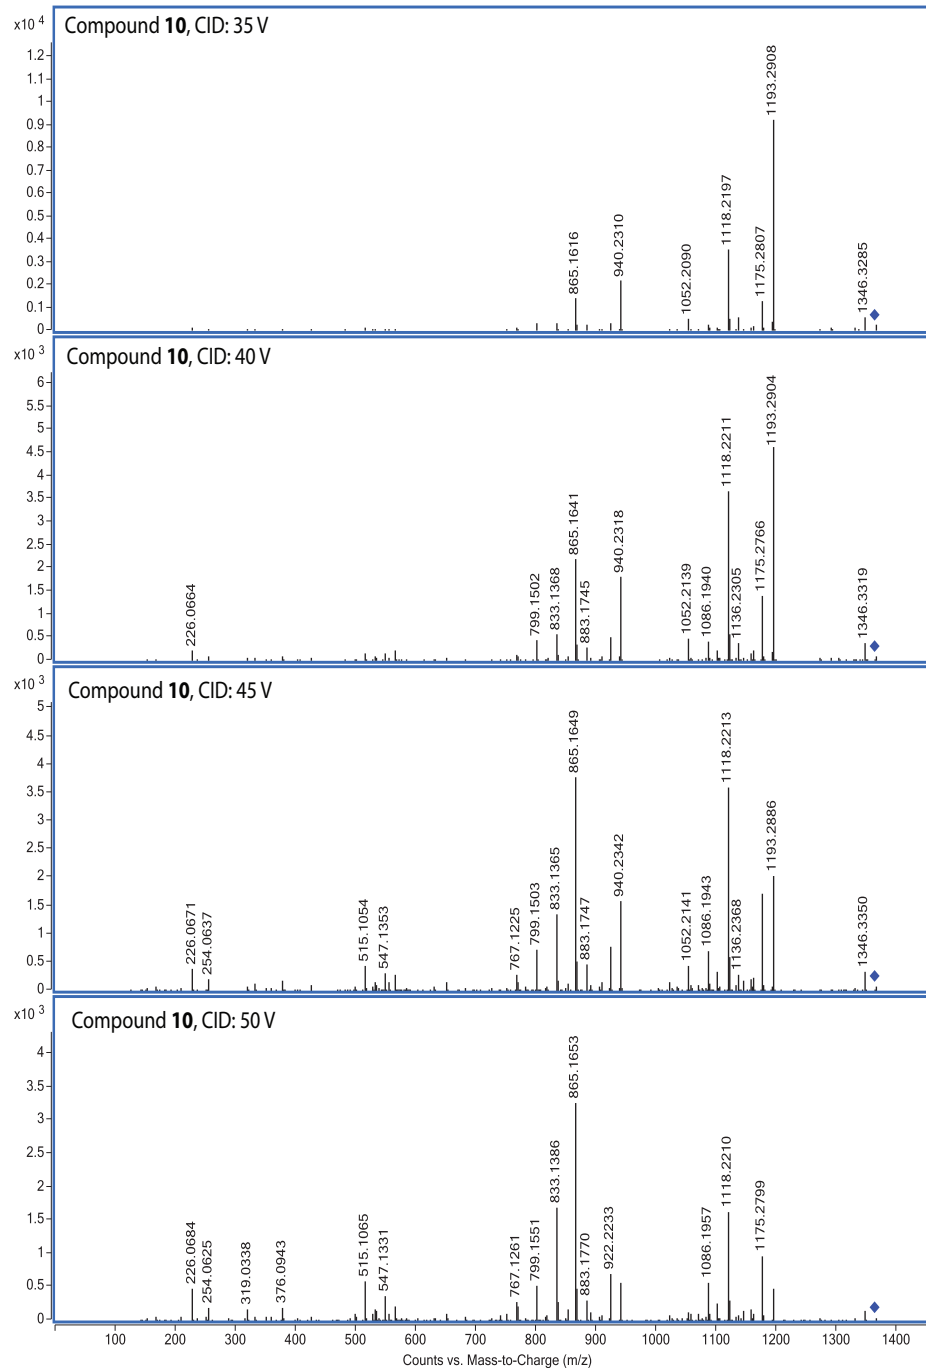



MSMS Figure 2: Compound **11** (1194.2541).

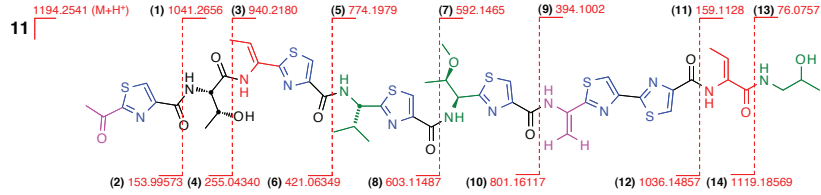

| Fragment                                    | Observed (M+H) <sup>+</sup> | Expected (M+H) <sup>+</sup> | Error (ppm) |
|---------------------------------------------|-----------------------------|-----------------------------|-------------|
| Parent-H <sub>2</sub> O                     | 1176.2572                   | 1176.24354                  | -11.61      |
| Parent-H <sub>2</sub> O-CH <sub>3</sub> OH  | 1144.2334                   | 1144.21732                  | -14.05      |
| <b>14</b>                                   | 1119.1996                   | 1119.18569                  | -12.43      |
| <b>14-CH<sub>3</sub>OH</b>                  | 1087.1707                   | 1087.15947                  | -10.33      |
| <b>12+NH<sub>2</sub></b>                    | 1053.1847                   | 1053.17512                  | -9.10       |
| <b>3</b>                                    | 940.2309                    | 940.21797                   | -13.75      |
| <b>3-H<sub>2</sub>O</b>                     | 922.2191                    | 922.20741                   | -12.68      |
| <b>12-2-H<sub>2</sub>O</b>                  | 865.1602                    | 865.14956                   | -12.30      |
| <b>12-2-H<sub>2</sub>O-CH<sub>3</sub>OH</b> | 833.1347                    | 833.12334                   | -13.64      |
| <b>12-4+NH<sub>2</sub></b>                  | 799.147                     | 799.13899                   | -10.02      |
| <b>12-4+NH<sub>2</sub>-CH<sub>3</sub>OH</b> | 767.1235                    | 767.11278                   | -13.97      |
| <b>10-4</b>                                 | 547.1332                    | 547.12504                   | -14.91      |
| <b>10-4-CH<sub>3</sub>OH</b>                | 515.1031                    | 515.09883                   | -8.29       |
| <b>9-H<sub>2</sub>O</b>                     | 376.0942                    | 376.08964                   | -12.12      |
| <b>14-10</b>                                | 319.0349                    | 319.03179                   | -9.75       |
| <b>4-CO</b>                                 | 227.0501                    | 227.04849                   | -7.09       |

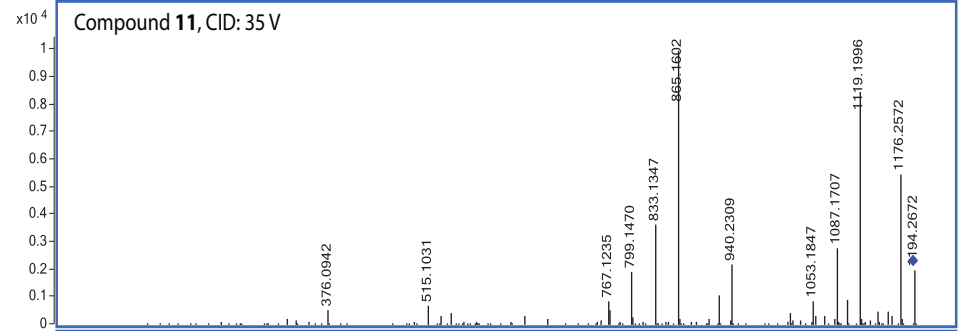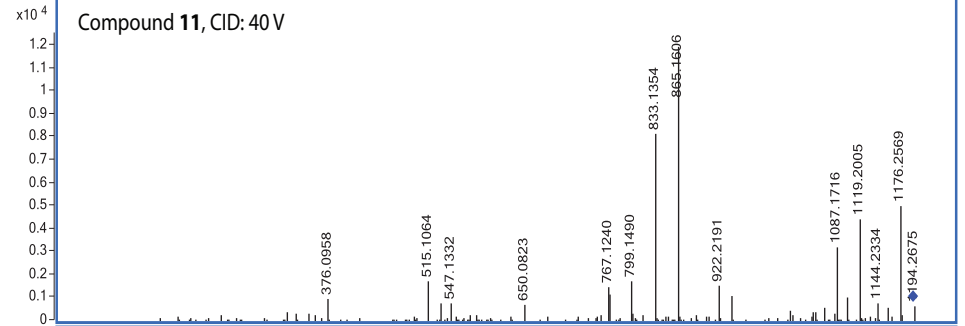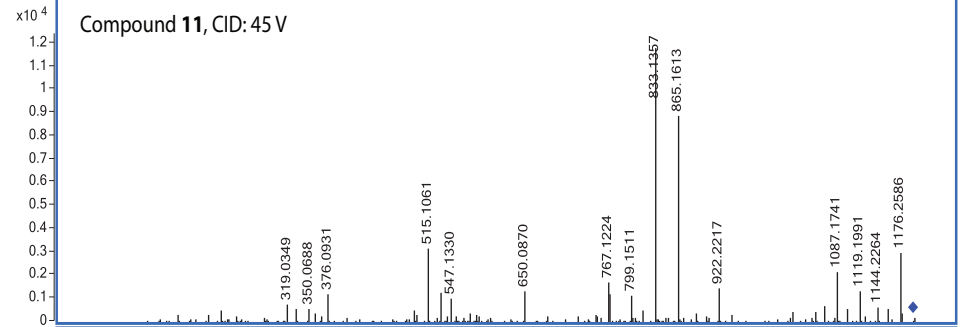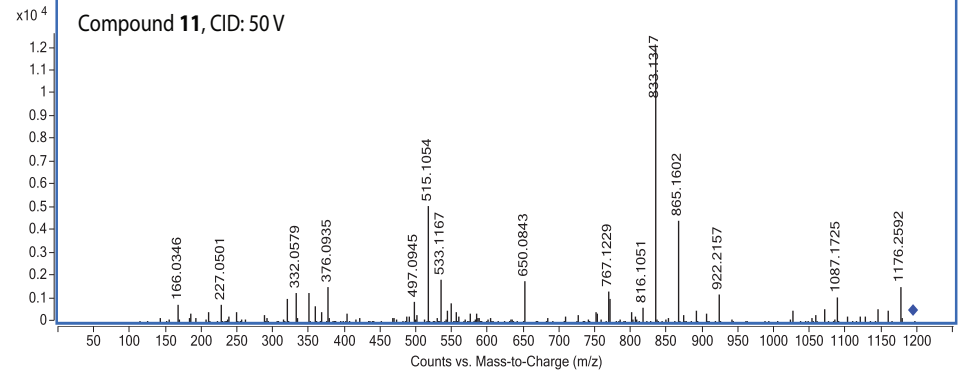

Table of <sup>1</sup>H & <sup>13</sup>C NMR shifts (ppm) for Compound **10** (1364.3232) (600 MHz, DMSO-*d*<sub>6</sub>).<sup>a</sup>

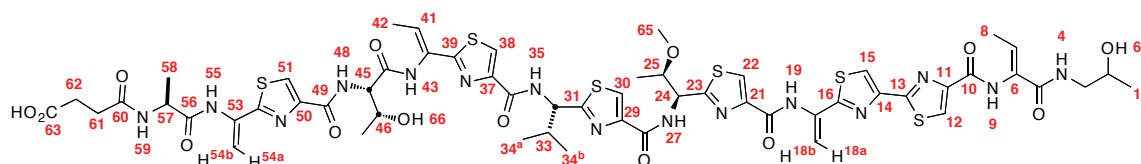

| Shift (ppm) | Integration | Proton             | HSQC  | COSY1     | COSY2     | TOCSY1    | TOCSY2    | HMBC1 | HMBC2 | HMBC3 |
|-------------|-------------|--------------------|-------|-----------|-----------|-----------|-----------|-------|-------|-------|
| 10.41       | 1H          | <b>19</b>          | N-H   | x         | x         | 6.43      | x         | 166.3 | x     | x     |
| 10.05       | 1H          | <b>43</b>          | N-H   | x         | x         | 6.70      | x         | 131.0 | x     | x     |
| 9.64        | 1H          | <b>55</b>          | N-H   | x         | x         | 6.03      | x         | 173.2 | x     | x     |
| 9.53        | 1H          | <b>9</b>           | N-H   | x         | x         | 1.69      | 6.51      | 159.9 | x     | x     |
| 8.86        | 1H          | <b>48</b>          | N-H   | 4.46-4.48 | x         | 4.29      | x         | x     | x     | x     |
| 8.75        | 1H          | <b>35</b>          | N-H   | 5.08      | x         | 0.86      | 0.95      | 161.2 | x     | x     |
| 8.60        | 1H          | <b>59</b>          | N-H   | 4.42-4.44 | x         | 1.29      | x         | 173.3 | x     | x     |
| 8.53        | 1H          | <b>12</b> (Thz 12) | 126.0 | x         | x         | x         | x         | 162.0 | 151.2 | x     |
| 8.45        | 1H          | <b>15</b> (Thz 11) | 120.4 | x         | x         | x         | x         | 166.4 | 147.6 | x     |
| 8.43        | 1H          | <b>22</b> (Thz 9)  | 126.7 | x         | x         | x         | x         | 172.9 | 149.3 | x     |
| 8.38        | 1H          | <b>30</b> (Thz 7)  | 126.2 | x         | x         | x         | x         | 173.8 | 148.3 | x     |
| 8.36        | 1H          | <b>27</b>          | N-H   | 5.47      | x         | 4.34-4.36 | x         | 161.0 | 56.2  | x     |
| 8.32        | 1H          | <b>51</b> (Thz 2)  | 125.9 | x         | x         | x         | x         | 165.5 | 150.0 | x     |
| 8.20        | 1H          | <b>38</b> (Thz 5)  | 124.9 | x         | x         | x         | x         | 168.6 | 149.8 | x     |
| 7.94        | 1H          | <b>4</b>           | N-H   | 3.00-3.03 | 3.07-3.11 | 0.99      | 3.68-3.71 | 165.0 | x     | x     |
| 6.70        | 1H          | <b>41</b>          | 126.9 | 1.67      | x         | 10.05     | x         | 168.0 | 131.0 | 14.2  |
| 6.51        | 1H          | <b>7</b>           | 128.7 | 1.58-1.62 | x         | 9.53      | x         | 165.0 | 131.5 | 13.8  |
| 6.43        | 1H          | <b>18a</b>         | 104.0 | x         | x         | 10.41     | x         | 166.4 | 134.2 | x     |
| 6.03        | 1H          | <b>54a</b>         | 105.9 | x         | x         | 9.64      | x         | 165.5 | 134.9 | x     |
| 5.73        | 1H          | <b>18b</b>         | 104.0 | x         | x         | x         | x         | 166.4 | x     | x     |
| 5.60        | 1H          | <b>54b</b>         | 105.9 | x         | x         | x         | x         | 165.5 | x     | x     |
| 5.47        | 1H          | <b>24</b>          | 56.2  | 4.34-4.36 | 8.36      | 1.28      | x         | 16.4  | x     | x     |
| 5.08        | 1H          | <b>32</b>          | 57.6  | 2.42-2.46 | 8.75      | 0.86      | 0.95      | 173.8 | x     | x     |
| 4.46-4.48   | 1H          | <b>45</b>          | 60.8  | 4.29      | 8.86      | 1.22      | x         | x     | x     | x     |
| 4.42-4.44   | 1H          | <b>57</b>          | 50.1  | 1.29      | 8.6       | x         | x         | 173.7 | 18.0  | x     |
| 4.34-4.36   | 1H          | <b>25</b>          | 77.6  | 1.28      | 5.47      | 8.36      | x         | x     | x     | x     |
| 4.29        | 1H          | <b>46</b>          | 67.2  | 1.22      | 4.46-4.48 | 8.86      | x         | x     | x     | x     |
| 3.68-3.71   | 1H          | <b>2</b>           | 65.8  | 3.00-3.03 | 3.07-3.11 | 7.94      | x         | 21.6  | x     | x     |
| 3.07-3.11   | 1H          | <b>3a,b</b>        | 47.6  | 3.68-3.71 | 7.94      | 0.99      | x         | 165.0 | x     | x     |
| 3.00-3.03   | 1H          | <b>3a,b</b>        | 47.6  | 3.68-3.71 | 7.94      | 0.99      | x         | 165.0 | x     | x     |
| 3.27        | 3H          | <b>65</b>          | 57.5  | x         | x         | x         | x         | x     | x     | x     |
| 2.68        | 1H          | <b>62a,b</b>       | 27.0  | 2.25-2.29 | x         | x         | x         | 172.0 | 34.0  | x     |
| 2.54        | 1H          | <b>62a,b</b>       | 27.0  | 2.25-2.29 | x         | x         | x         | 172.0 | 34.0  | x     |
| 2.42-2.46   | 1H          | <b>33</b>          | 32.7  | 0.86      | 0.95      | x         | x         | 173.6 | 58.0  | 40.3  |
| 2.25-2.29   | 2H          | <b>61a,b</b>       | 33.9  | 2.54      | 2.68      | x         | x         | 173.3 | 27.0  | x     |
| 1.69        | 3H          | <b>8</b>           | 13.8  | 6.51      | x         | x         | x         | 130.5 | 128.3 | x     |
| 1.67        | 3H          | <b>42</b>          | 14.2  | 6.70      | x         | x         | x         | 68.0  | 29.9  | 11.5  |
| 1.29        | 3H          | <b>58</b>          | 18.1  | 4.42-4.44 | x         | 8.60      | x         | 173.2 | 50.1  | x     |
| 1.28        | 3H          | <b>26</b>          | 16.4  | 4.34-4.36 | x         | 5.47      | x         | 77.6  | 56.2  | x     |
| 1.22        | 3H          | <b>47</b>          | 21.4  | 4.29      | x         | 4.46-4.48 | x         | 60.8  | 67.2  | x     |
| 0.99        | 3H          | <b>1</b>           | 21.6  | 3.68-3.71 | x         | 3.00-3.03 | 3.07-3.11 | 65.8  | 47.6  | x     |
| 0.95        | 3H          | <b>34a,b</b>       | 19.2  | 2.42-2.46 | x         | 5.08      | 8.75      | 57.7  | 32.7  | 20.1  |
| 0.86        | 3H          | <b>34a,b</b>       | 20.1  | 2.42-2.46 | x         | 5.08      | 8.75      | 57.6  | 32.9  | 19.2  |

| Carbon | Shift (ppm) |
|--------|-------------|
| 1      | 21.6        |
| 2      | 65.8        |
| 3      | 47.6        |
| 5      | 165.0       |
| 6      | 131.5       |
| 7      | 128.7       |
| 8      | 13.8        |
| 10     | 159.9       |
| 11     | 151.2       |
| 12     | 126.0       |
| 13     | 162.0       |
| 14     | 147.6       |
| 15     | 120.4       |
| 16     | 166.4       |
| 17     | 134.2       |
| 18     | 104.0       |
| 20     | 166.3       |
| 21     | 149.3       |
| 22     | 126.7       |
| 23     | 172.9       |
| 24     | 56.2        |
| 25     | 77.6        |
| 26     | 16.4        |
| 28     | 161.0       |
| 29     | 148.3       |
| 30     | 126.2       |
| 31     | 173.8       |
| 32     | 57.6        |
| 33     | 32.7        |
| 34a    | 19.2        |
| 34b    | 20.1        |
| 36     | 161.2       |
| 37     | 149.8       |
| 38     | 124.9       |
| 39     | 168.6       |
| 40     | 131.0       |
| 41     | 126.9       |
| 42     | 14.2        |
| 45     | 60.8        |
| 46     | 67.2        |
| 47     | 21.4        |
| 50     | 150.0       |
| 51     | 125.9       |
| 52     | 165.5       |
| 53     | 134.9       |
| 54     | 105.9       |
| 56     | 173.2       |
| 57     | 50.1        |
| 58     | 18.1        |
| 60     | 173.3       |
| 61     | 34.0        |
| 62     | 27.0        |
| 63     | 172.0       |
| 65     | 57.5        |

<sup>a</sup> Carbon shifts are based on 2D HSQC/HMBC data. We tentatively assign the stereochemistry at carbons 24, 25, 32, 45, 46, and 57 on analogy to that present in Micrococcin P1. Additionally, we note that this is the stereochemistry of the natural amino acids encoded by the structural genes, tcIE-H. The strong TOCSY between acetamide N-Hs 9 and 43 with their respective vinylic protons, 7 and 41, indicates a *cis*-double bond geometry at these positions, as illustrated. Due to bond angle constraint, correlations between Dhb/Dha N-Hs and *cis*-vinylic protons do not typically appear in a 2D TOCSY.

NMR Figure 1: Compound **10** (1364.3232) 1H NMR (600 MHz, DMSO-*d*<sub>6</sub>)

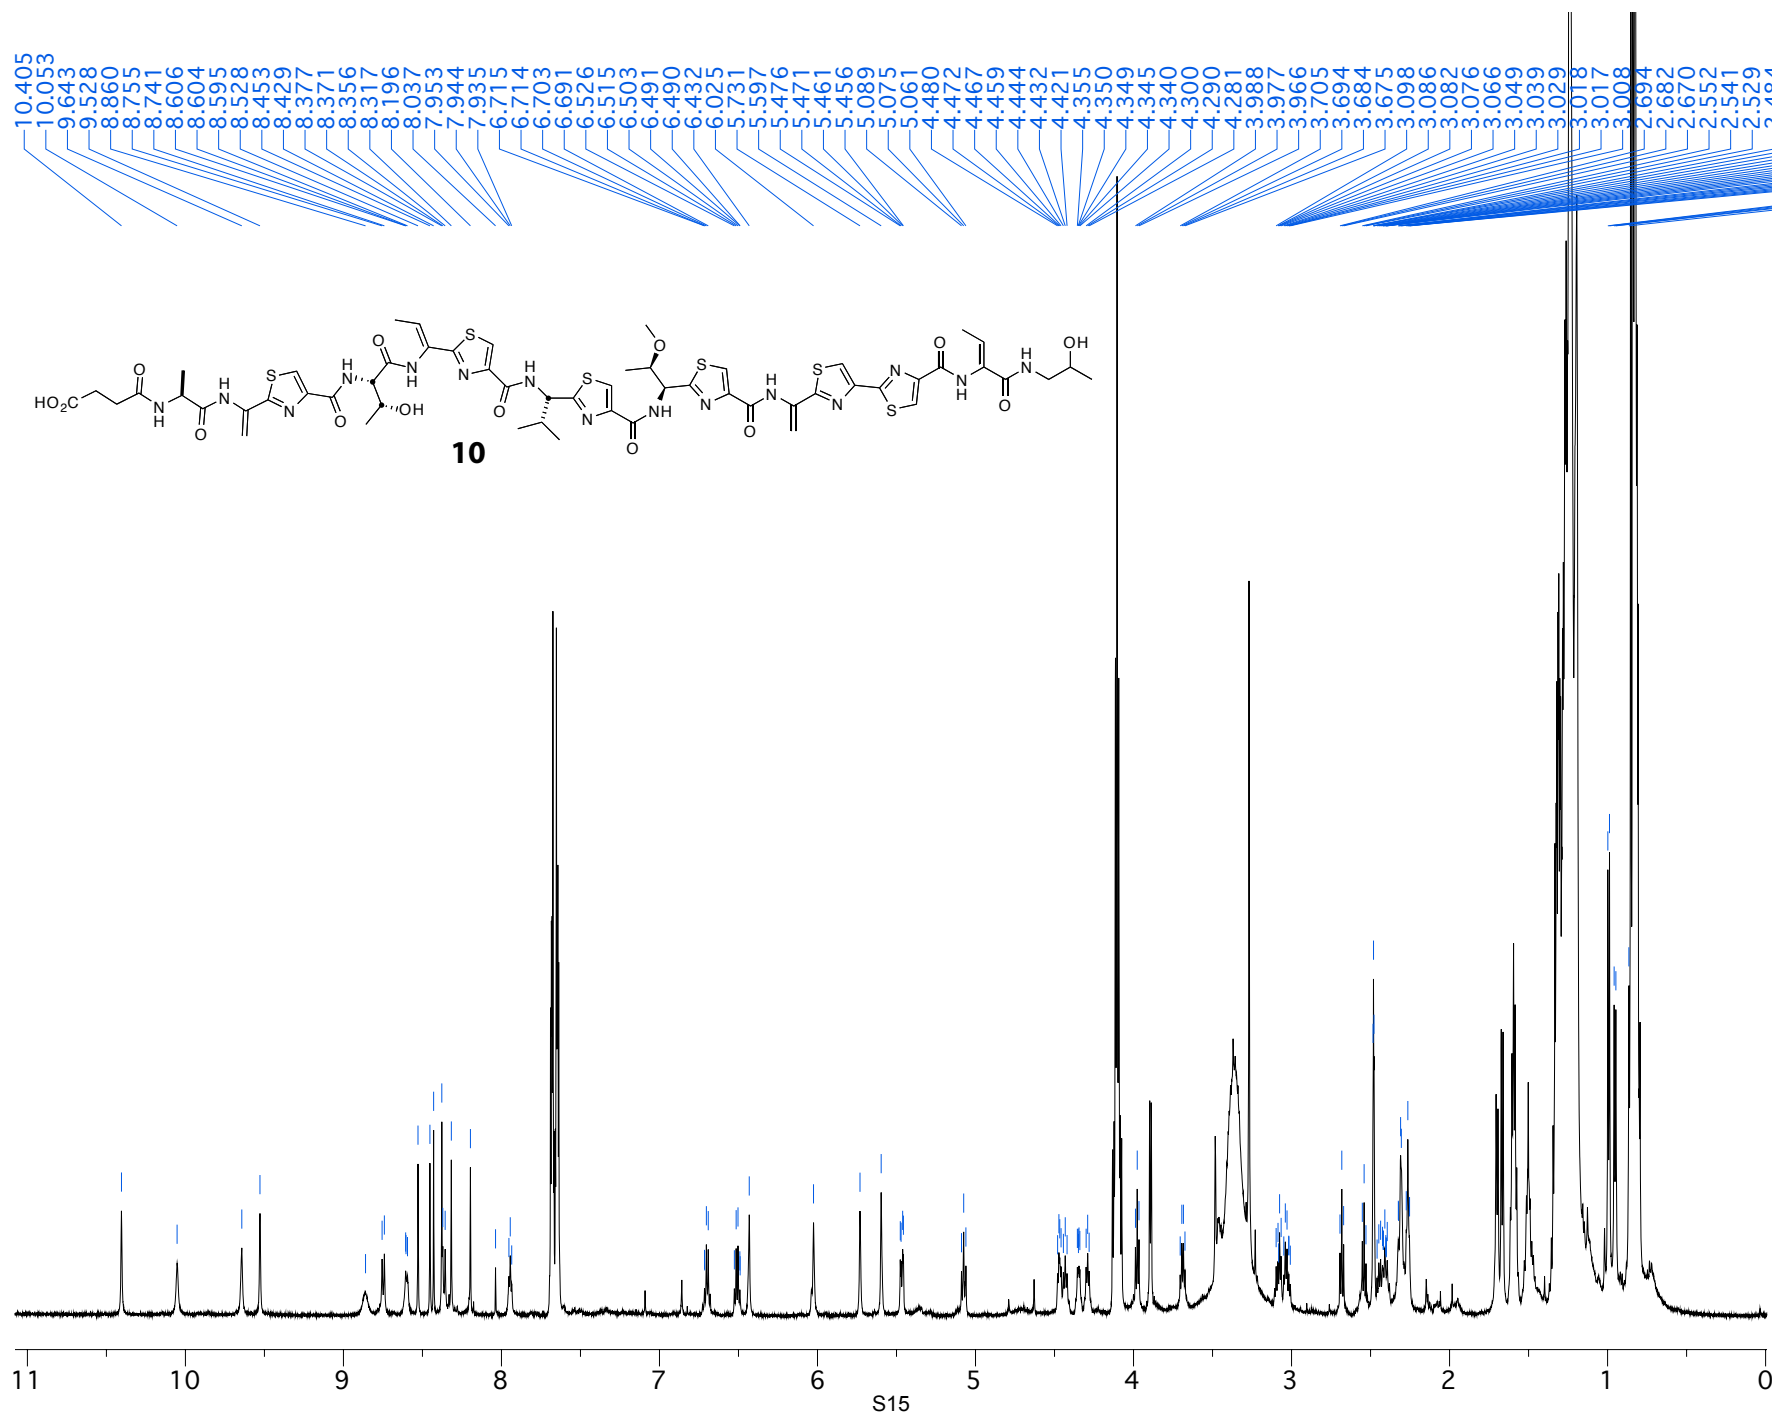

NMR Figure 2: Compound **10** (1364.3232) 1H-COSY (600 MHz, DMSO-*d*<sub>6</sub>)

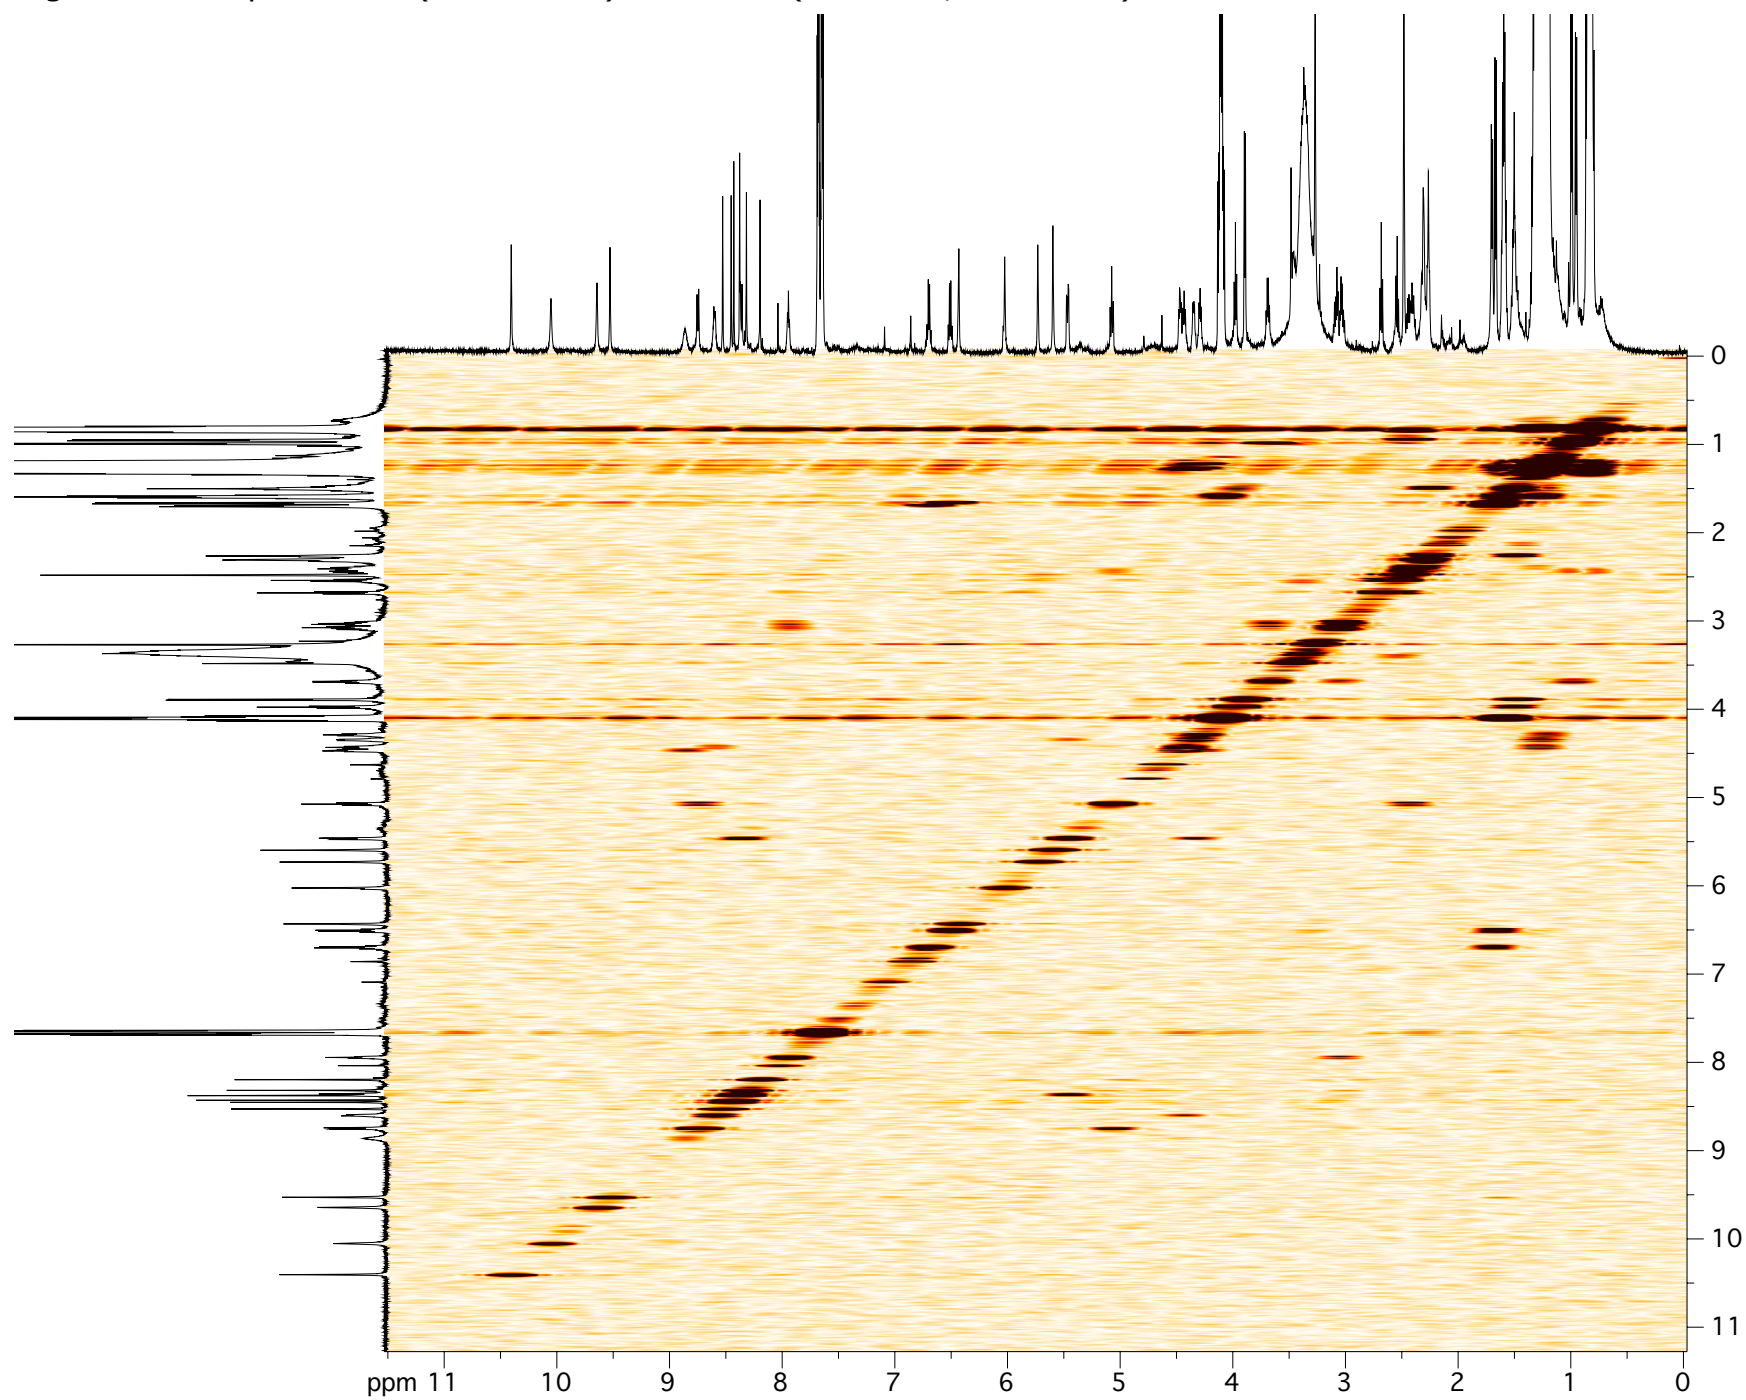

NMR Figure 3: Compound **10** (1364.3232) 1H-TOCSY (600 MHz, DMSO-*d*6)

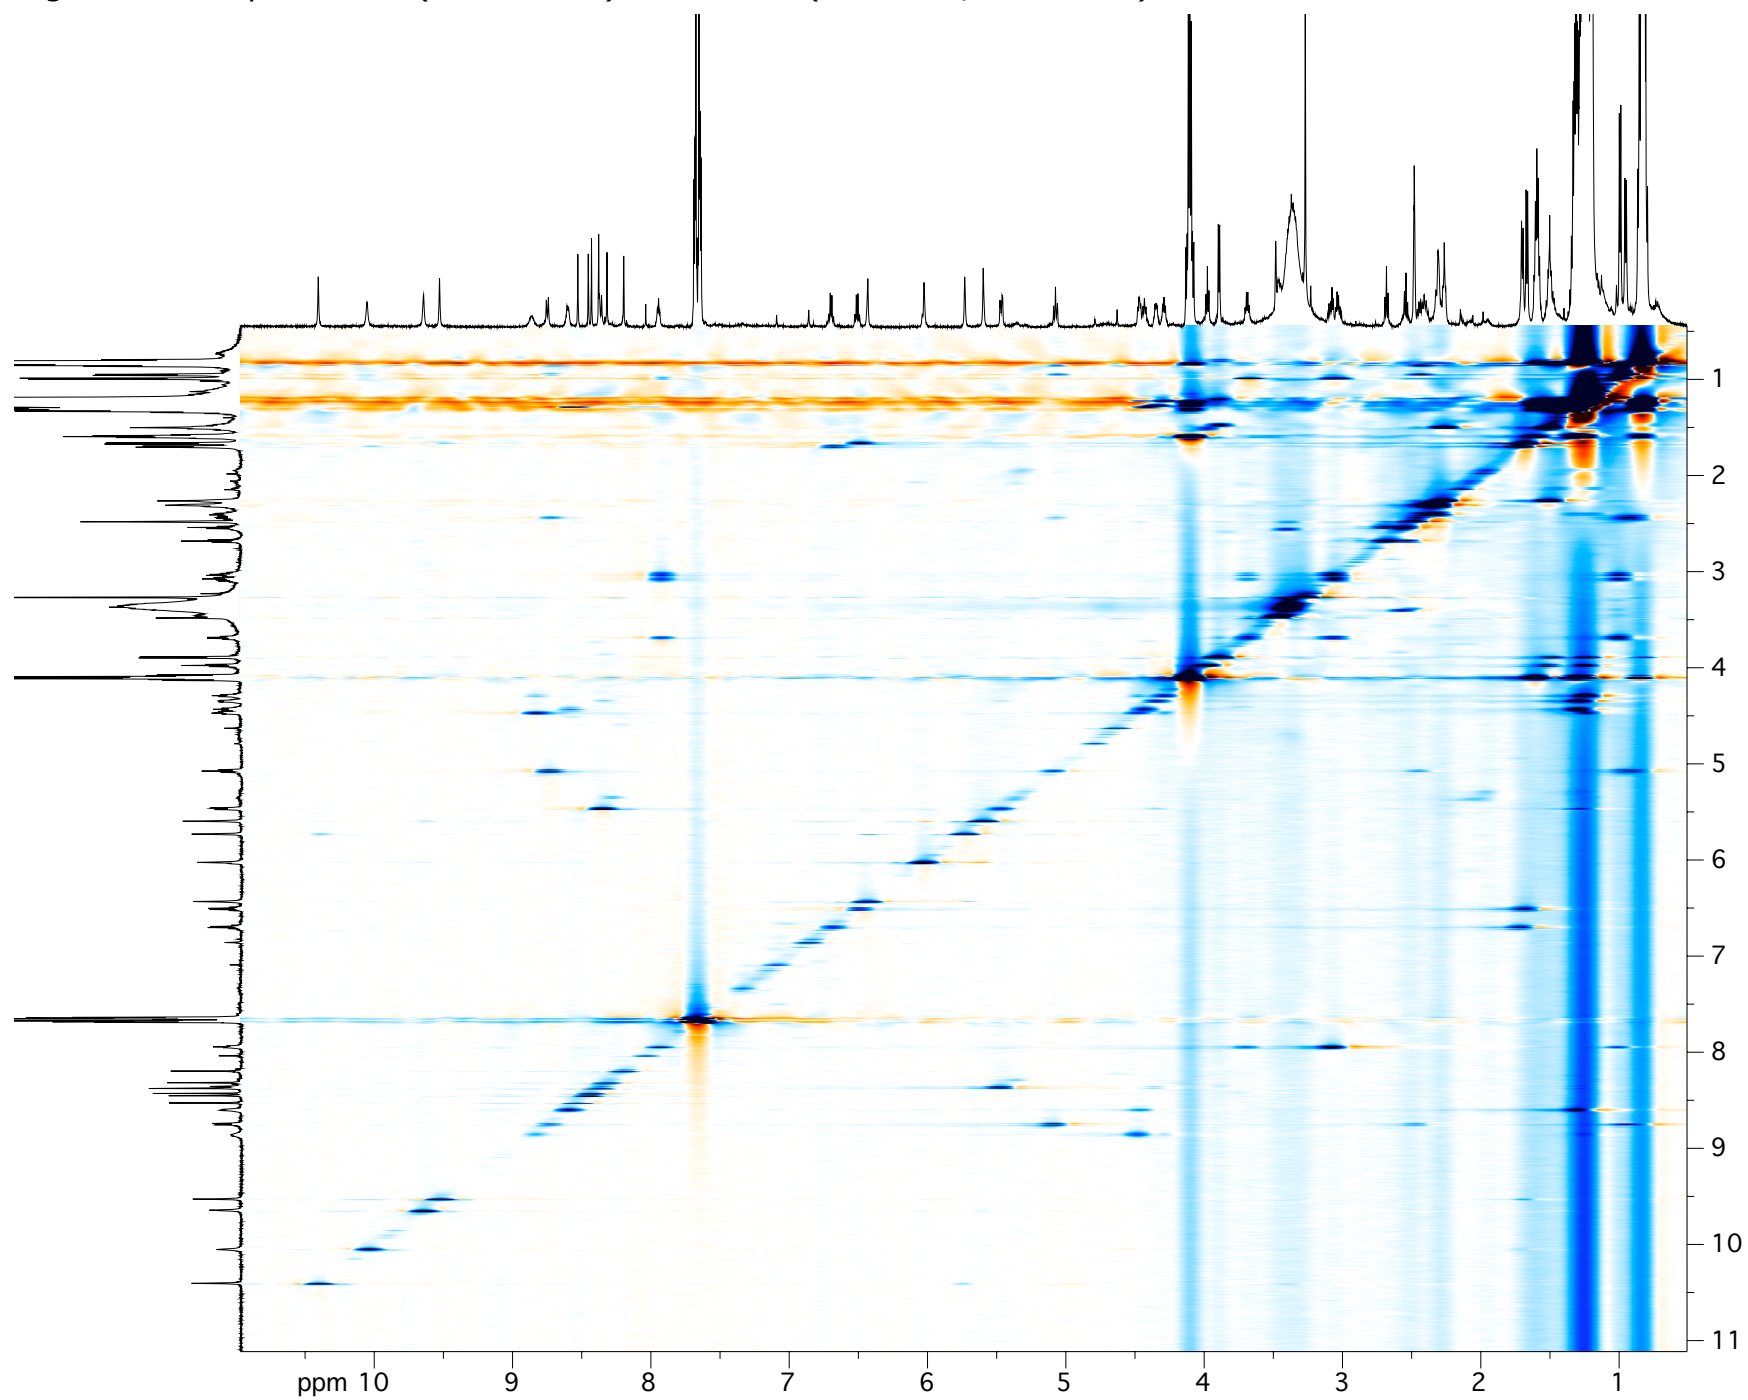



NMR Figure 4: Compound **10** (1364.3232) 1H-13C-gHSQC (600 MHz, DMSO-*d*<sub>6</sub>)

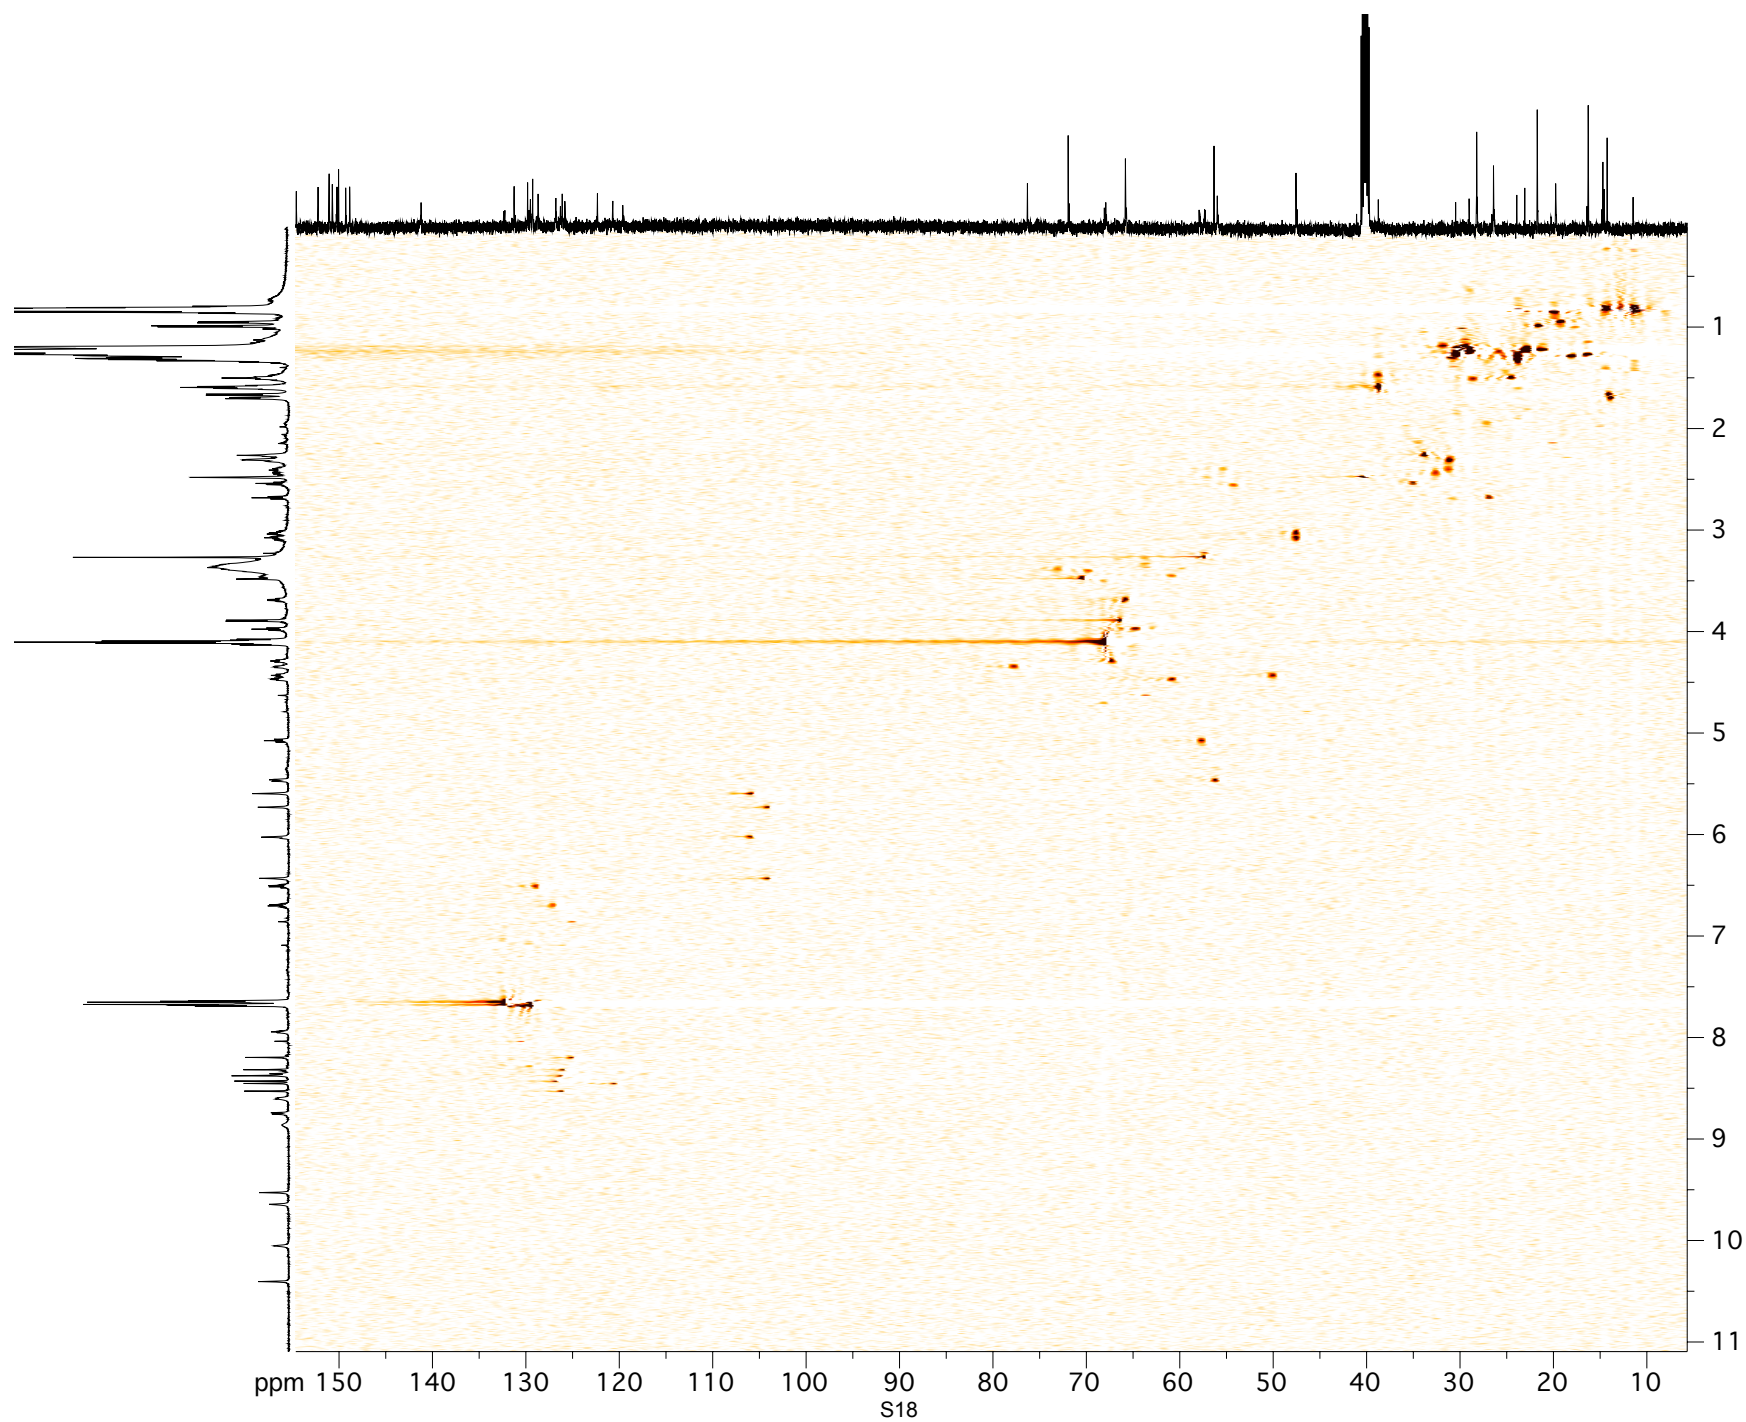

NMR Figure 5: Compound **10** (1364.3232) 1H-13C-gHMBC (600 MHz, DMSO-*d*<sub>6</sub>)

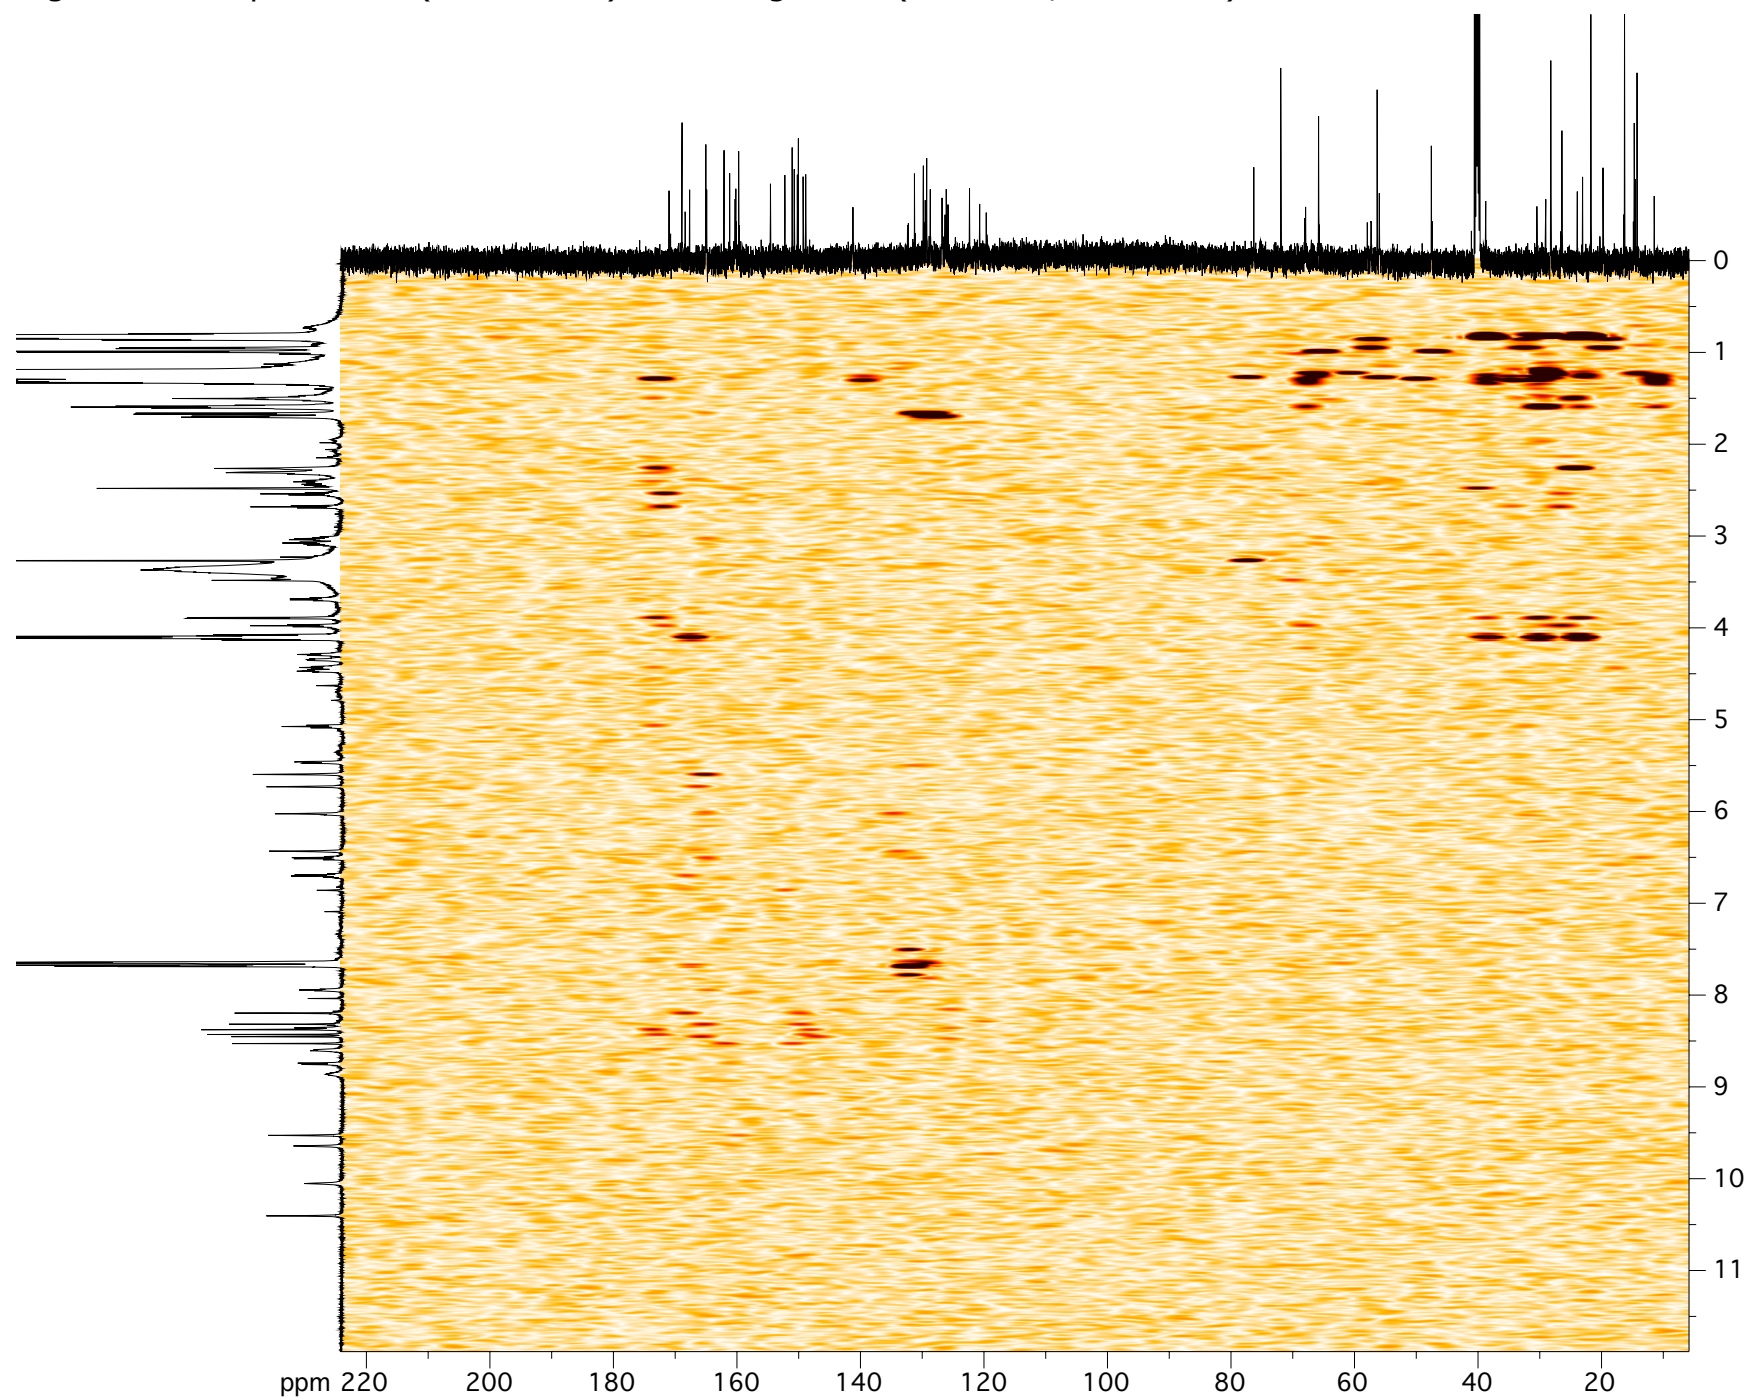

Supplement: NIHMS228904-supplement-1_si_001.pdf [file NIHMS228904-supplement-1_si_001.pdf]
